# Supplementary material
Source: publisher figshare collection journal article supplement (https://acs.figshare.com/ndownloader/files/4370320)
Supplement: Supplementary file 1 [file 4370320]

## Supporting Information (SI)

# Ferrocene-Based Heteroditopic Receptors Displaying High Selectivity toward Lead and Mercury Metal Cations through Different Channel

María Alfonso, Alberto Tárraga, \* and Pedro Molina\*

Departamento de Química Orgánica. Facultad de Química. Universidad de Murcia.

Campus de Espinardo, E-30100 Murcia, Spain.

E-mail: [pmolina@um.es](mailto:pmolina@um.es); atarraga@um.es

### Table of contents

|                                                                                                                                                                |     |
|----------------------------------------------------------------------------------------------------------------------------------------------------------------|-----|
| NMR spectra of <b>2</b> , <b>3</b> , <b>4</b> and <b>7</b>                                                                                                     | S4  |
| <b>Figure S1.</b> Evolution of CV and OSWV of <b>4</b> in the presence of increasing amounts of Pb(ClO <sub>4</sub> ) <sub>2</sub> in CH <sub>3</sub> CN.      | S14 |
| <b>Figure S2.</b> Evolution of the LSW of <b>4</b> in the presence of increasing amountsof several cations in CH <sub>3</sub> CN                               | S15 |
| <b>Figure S3.</b> Evolution of the LSW of <b>7</b> in the presence of increasing amountsof Hg(OTf) <sub>2</sub> and Cu(OTf) <sub>2</sub> in CH <sub>3</sub> CN | S16 |
|                                                                                                                                                                | S1  |

|                                                                                                                                                                                                                                                                                                                  |     |
|------------------------------------------------------------------------------------------------------------------------------------------------------------------------------------------------------------------------------------------------------------------------------------------------------------------|-----|
| <b>Figure S4.</b> Evolution of OSWV of <b>4</b> in the presence of increasing amounts of [(n-Bu) <sub>4</sub> ]H <sub>2</sub> PO <sub>4</sub> and 20 equivalent of acetic acid in CH <sub>3</sub> CN                                                                                                             | S16 |
| <b>Figure S5.</b> Evolution of OSWV of <b>4</b> in the presence of increasing amounts of [(n-Bu) <sub>4</sub> ] <sub>3</sub> HP <sub>2</sub> O <sub>7</sub> and [(n-Bu) <sub>4</sub> N]F in absence and in the presence of 20 equivalent of acetic acid in CH <sub>3</sub> CN                                    | S17 |
| <b>Figure S6.</b> Evolution of the OSWV of <b>4</b> in the presence of increasing amounts of [(n-Bu) <sub>4</sub> N]OH in CH <sub>3</sub> CN                                                                                                                                                                     | S18 |
| <b>Figure S7.</b> Evolution of OSWV of <b>7</b> in the presence of increasing amounts of [(n-Bu) <sub>4</sub> N]H <sub>2</sub> PO <sub>4</sub> and 20 equivalent of acetic acid in CH <sub>3</sub> CN                                                                                                            | S18 |
| <b>Figure S8.</b> Evolution of OSWV of <b>7</b> in the presence of increasing amounts of [(n-Bu) <sub>4</sub> N] <sub>3</sub> HP <sub>2</sub> O <sub>7</sub> and [(n-Bu) <sub>4</sub> N]AcO in absence and in the presence of 20 equivalent of acetic acid in CH <sub>3</sub> CN                                 | S19 |
| <b>Figure S9.</b> Evolution of OSWV of <b>7</b> in the presence of increasing amounts of [(n-Bu) <sub>4</sub> N]F in absence and in the presence of 20 equivalent of acetic acid in CH <sub>3</sub> CN                                                                                                           | S20 |
| <b>Figure S10.</b> Evolution of the OSWV of <b>7</b> in the presence of increasing amounts of [(n-Bu) <sub>4</sub> N]OH in CH <sub>3</sub> CN                                                                                                                                                                    | S20 |
| <b>Table S1.</b> Electrochemical data of receptor <b>4</b> and <b>7</b> in the presence of anions                                                                                                                                                                                                                | S21 |
| <b>Figure S11.</b> Evolution of the OSWV of <b>4</b> in the presence of several anions and Pb <sup>2+</sup> in CH <sub>3</sub> CN                                                                                                                                                                                | S21 |
| <b>Figure S12.</b> Evolution of the OSWV of <b>7</b> in the presence of several anions and Hg <sup>2+</sup> in CH <sub>3</sub> CN                                                                                                                                                                                | S22 |
| <b>Figure S13.</b> Changes in the absorption spectrum of <b>4</b> upon addition of increasing amounts of Hg(OTf) <sub>2</sub> and Cu(OTf) <sub>2</sub> and in CH <sub>3</sub> CN                                                                                                                                 | S22 |
| <b>Figure S14.</b> Changes in the absorption spectrum of <b>7</b> upon addition of increasing amounts of Cu(OTf) <sub>2</sub> in CH <sub>3</sub> CN                                                                                                                                                              | S23 |
| <b>Figure S15.</b> Changes in the absorption spectrum of <b>4</b> upon addition of increasing amounts of [(n-Bu) <sub>4</sub> N]AcO and [(n-Bu) <sub>4</sub> N]H <sub>2</sub> PO <sub>4</sub> in CH <sub>3</sub> CN                                                                                              | S23 |
| <b>Figure S16.</b> Changes in the absorption spectrum of <b>4</b> upon addition of increasing amounts of several anions in absence and in the presence of 20 equivalent of acetic acid in CH <sub>3</sub> CN                                                                                                     | S24 |
| <b>Figure S17.</b> Changes in the absorption spectrum of <b>4</b> upon addition of increasing amounts of [(n-Bu) <sub>4</sub> N]AcO and [(n-Bu) <sub>4</sub> N]H <sub>2</sub> PO <sub>4</sub> in CH <sub>3</sub> CN                                                                                              | S25 |
| <b>Figure S18.</b> Changes in the absorption spectrum of <b>7</b> upon addition of increasing amounts of [(n-Bu) <sub>4</sub> N] <sub>3</sub> HP <sub>2</sub> O <sub>7</sub> in absence and in the presence of 20 equivalent of acetic acid in CH <sub>3</sub> CN                                                | S25 |
| <b>Figure S19.</b> Changes in the absorption spectrum of <b>7</b> upon addition of increasing amounts of [(n-Bu) <sub>4</sub> N]F in absence and in the presence of 20 equivalent of acetic acid and [(n-Bu) <sub>4</sub> N]OH in CH <sub>3</sub> CN                                                             | S26 |
| <b>Figure S20.</b> Change of absorbance of <b>4</b> upon addition of Pb(ClO <sub>4</sub> ) <sub>2</sub> and Hg(OTf) <sub>2</sub> indicating the stoichiometry formation of complexes                                                                                                                             | S27 |
| <b>Figure S21.</b> Reversibility experiment for compound <b>4</b> .                                                                                                                                                                                                                                              | S27 |
| <b>Figure S22.</b> Semilogarithmic plot for determining the detection limit of <b>4</b> towards Pb(ClO <sub>4</sub> ) <sub>2</sub> and Hg(OTf) <sub>2</sub>                                                                                                                                                      | S28 |
| <b>Figure S23.</b> Semilogarithmic plot for determining the detection limit of <b>7</b> towards Hg(OTf) <sub>2</sub>                                                                                                                                                                                             | S28 |
| <b>Table S2.</b> UV-vis data for receptors <b>4</b> and <b>7</b> in the presence of several cations and anions                                                                                                                                                                                                   | S29 |
| <b>Figure S24.</b> Fluorescence intensity of ligands <b>4</b> in CH <sub>3</sub> CN after addition of several cations and fluorescence emission intensity of <b>4</b> upon addition of 1 equiv of Pb(ClO <sub>4</sub> ) <sub>2</sub> in the presence of 1 equiv of interference metal ions in CH <sub>3</sub> CN | S30 |
| <b>Figure S25.</b> Changes in the fluorescence emission of <b>4</b> upon addition of Pb(ClO <sub>4</sub> ) <sub>2</sub> in CH <sub>3</sub> CN and visual features observed in the CH <sub>3</sub> CN solutions addition of Pb(ClO <sub>4</sub> ) <sub>2</sub>                                                    | S30 |

|                                                                                                                                                                                                                                                                                                                 |     |
|-----------------------------------------------------------------------------------------------------------------------------------------------------------------------------------------------------------------------------------------------------------------------------------------------------------------|-----|
| <b>Figure S26</b> Semilogarithmic plot for determining the detection limit of <b>4</b> towards $\text{Pb}(\text{ClO}_4)_2$                                                                                                                                                                                      | S31 |
| <b>Table S3.</b> Fluorescence data for receptor <b>4</b> in the presence of $\text{Pb}(\text{ClO}_4)_2$ in $\text{CH}_3\text{CN}$ solution                                                                                                                                                                      | S31 |
| <b>Figure S27.</b> Fluorescence intensity of ligands <b>7</b> in $\text{CH}_3\text{CN}$ after addition of several cations and fluorescence emission intensity of <b>7</b> upon addition of 2 equiv of $\text{Hg}(\text{OTf})_2$ in the presence of 2 equiv of interference metal ions in $\text{CH}_3\text{CN}$ | S31 |
| <b>Figure S28.</b> Semilogarithmic plot for determining the detection limit of <b>7</b> towards $\text{Hg}(\text{OTf})_2$                                                                                                                                                                                       | S32 |
| <b>Chart 1.</b> Schematic representation of the binding mode between $\text{Hg}^{2+}$ and <b>4</b> .                                                                                                                                                                                                            | S32 |
| <b>Table S4.</b> $^1\text{H}$ -NMR titration data for receptor <b>4</b> in the presence of $\text{Pb}(\text{ClO}_4)_2$ , $[(\text{n-Bu})_4\text{N}]\text{AcO}$ and $[(\text{n-Bu})_4]\text{H}_2\text{PO}_4$ in $\text{CH}_3\text{CN}$ solution                                                                  | S33 |
| <b>Figure S29.</b> Changes in the $^1\text{H}$ -NMR spectrum of <b>4</b> upon addition of increasing amounts of $[(\text{n-Bu})_4\text{N}]\text{AcO}$                                                                                                                                                           | S33 |
| <b>Figure S30.</b> Changes in the $^1\text{H}$ -NMR spectrum of <b>4</b> upon addition of increasing amounts of $[(\text{n-Bu})_4\text{N}]\text{H}_2\text{PO}_4$                                                                                                                                                | S34 |
| <b>Table S5.</b> $^1\text{H}$ -NMR titration data for receptor <b>7</b> in the presence of $\text{Hg}(\text{OTf})_2$ , $[(\text{n-Bu})_4]\text{AcO}$ and $[(\text{n-Bu})_4\text{N}]\text{H}_2\text{PO}_4$ in $\text{CH}_3\text{CN}$ in DMSO solution                                                            | S34 |
| <b>Figure S31.</b> Changes in the $^1\text{H}$ -NMR spectrum of <b>7</b> upon addition of increasing amounts of $[(\text{n-Bu})_4\text{N}]\text{AcO}$                                                                                                                                                           | S35 |
| <b>Figure S32.</b> Changes in the $^1\text{H}$ -NMR spectrum of <b>7</b> upon addition of increasing amounts of $[(\text{n-Bu})_4\text{N}]\text{H}_2\text{PO}_4$                                                                                                                                                | S35 |
| <b>Figure S33.</b> Relative abundance of the isotopic cluster of the complex for <b>4</b> with $\text{Pb}(\text{ClO}_4)_2$ and $\text{Hg}(\text{OTf})_2$                                                                                                                                                        | S36 |
| <b>Figure S34.</b> Relative abundance of the isotopic cluster of the complex for <b>7</b> with $\text{Hg}(\text{OTf})_2$                                                                                                                                                                                        | S37 |
| <b>Figure S35.</b> ESI-MS spectra of an acetonitrile solution of an equimolecular amount of $[(\text{n-Bu})_4]\text{AcO}$ and ligand <b>4</b>                                                                                                                                                                   | S38 |
| <b>Figure S36.</b> ESI-MS spectra of an acetonitrile solution of an equimolecular amount of $[(\text{n-Bu})_4]\text{AcO}$ and ligand <b>4</b>                                                                                                                                                                   | S38 |
| <b>Figure S37.</b> ESI-MS spectra of an acetonitrile solution of an equimolecular amount of $[(\text{n-Bu})_4]\text{AcO}$ and $\text{Pb}(\text{ClO}_4)_2$ and ligand <b>4</b>                                                                                                                                   | S39 |
| <b>Figure S38.</b> ESI-MS spectra of an acetonitrile solution of an equimolecular amount of $[(\text{n-Bu})_4]\text{AcO}$ and ligand <b>7</b>                                                                                                                                                                   | S39 |
| <b>Figure S39.</b> ESI-MS spectra of an acetonitrile solution of an equimolecular amount of $[(\text{n-Bu})_4]\text{AcO}$ and ligand <b>7</b>                                                                                                                                                                   | S40 |
| <b>Figure S40.</b> Changes in the fluorescence emission spectrum of <b>4</b> and of the complex $[\mathbf{4}\cdot\text{Pb}^{2+}]$ upon addition of several anions.                                                                                                                                              | S42 |
| <b>Figure S41.</b> Changes in the fluorescence emission spectrum of <b>7</b> and of the complex $[\mathbf{7}\cdot\text{Hg}^{2+}]$ upon addition of several anions.                                                                                                                                              | S41 |
| <b>General Comments</b>                                                                                                                                                                                                                                                                                         | S42 |

**6-amino-7-nitrodibenzo[a,c]phenazine 2**

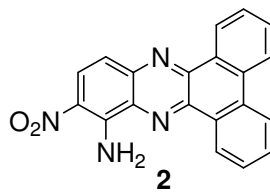

**<sup>1</sup>H NMR (400 MHz, DMSO-d<sub>6</sub>)**

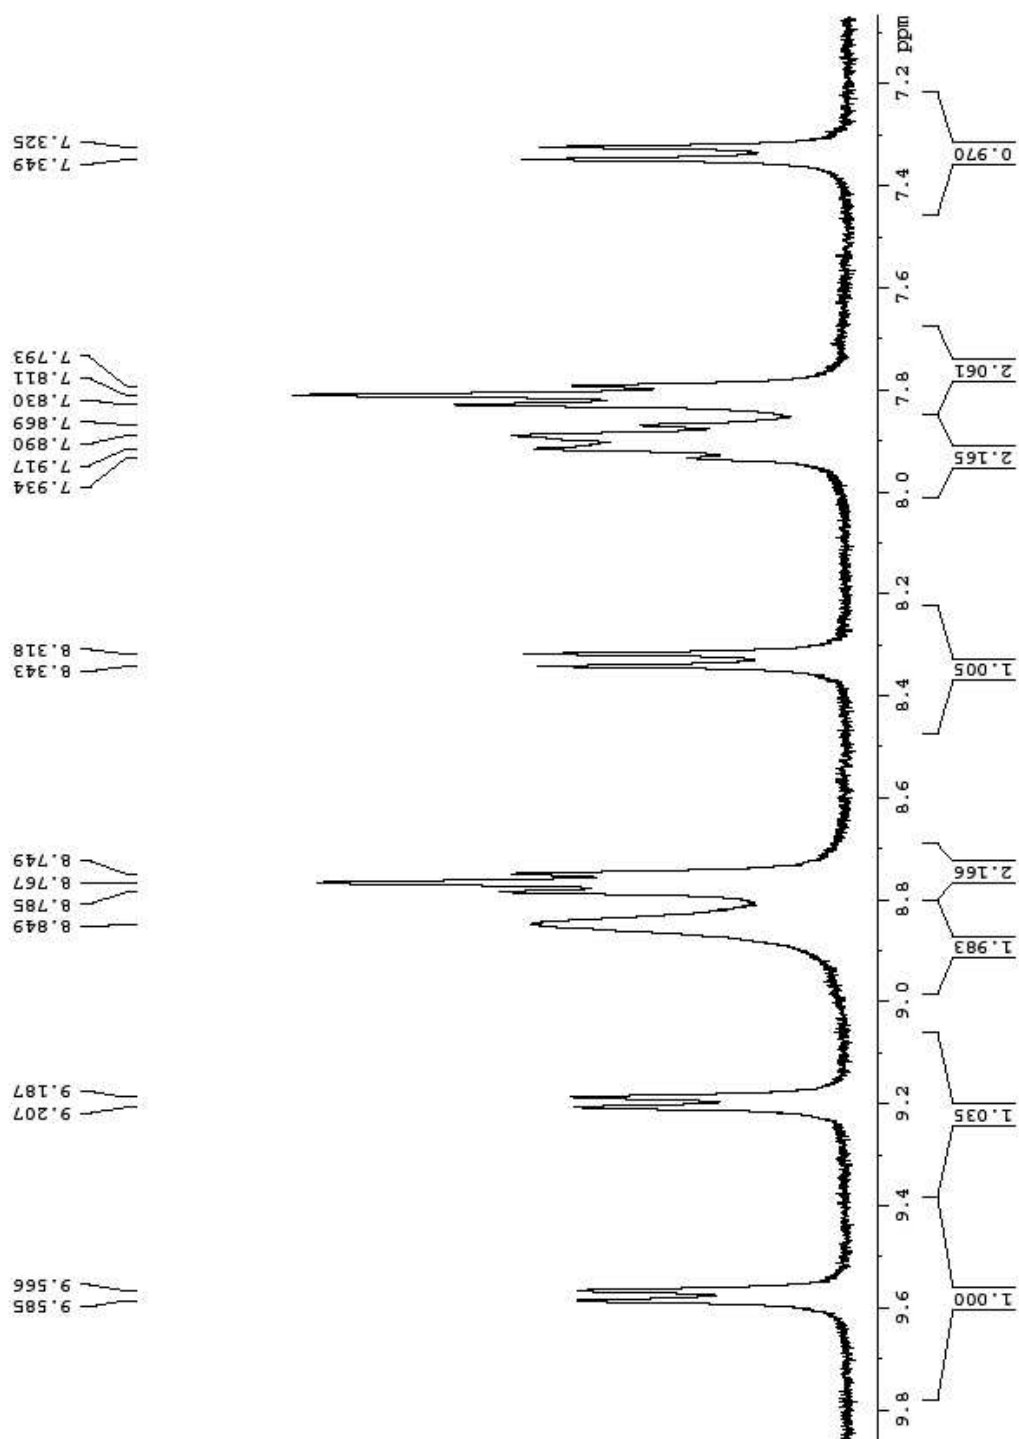

$^{13}\text{C}$  NMR (100 MHz, DMSO- $d_6$ )

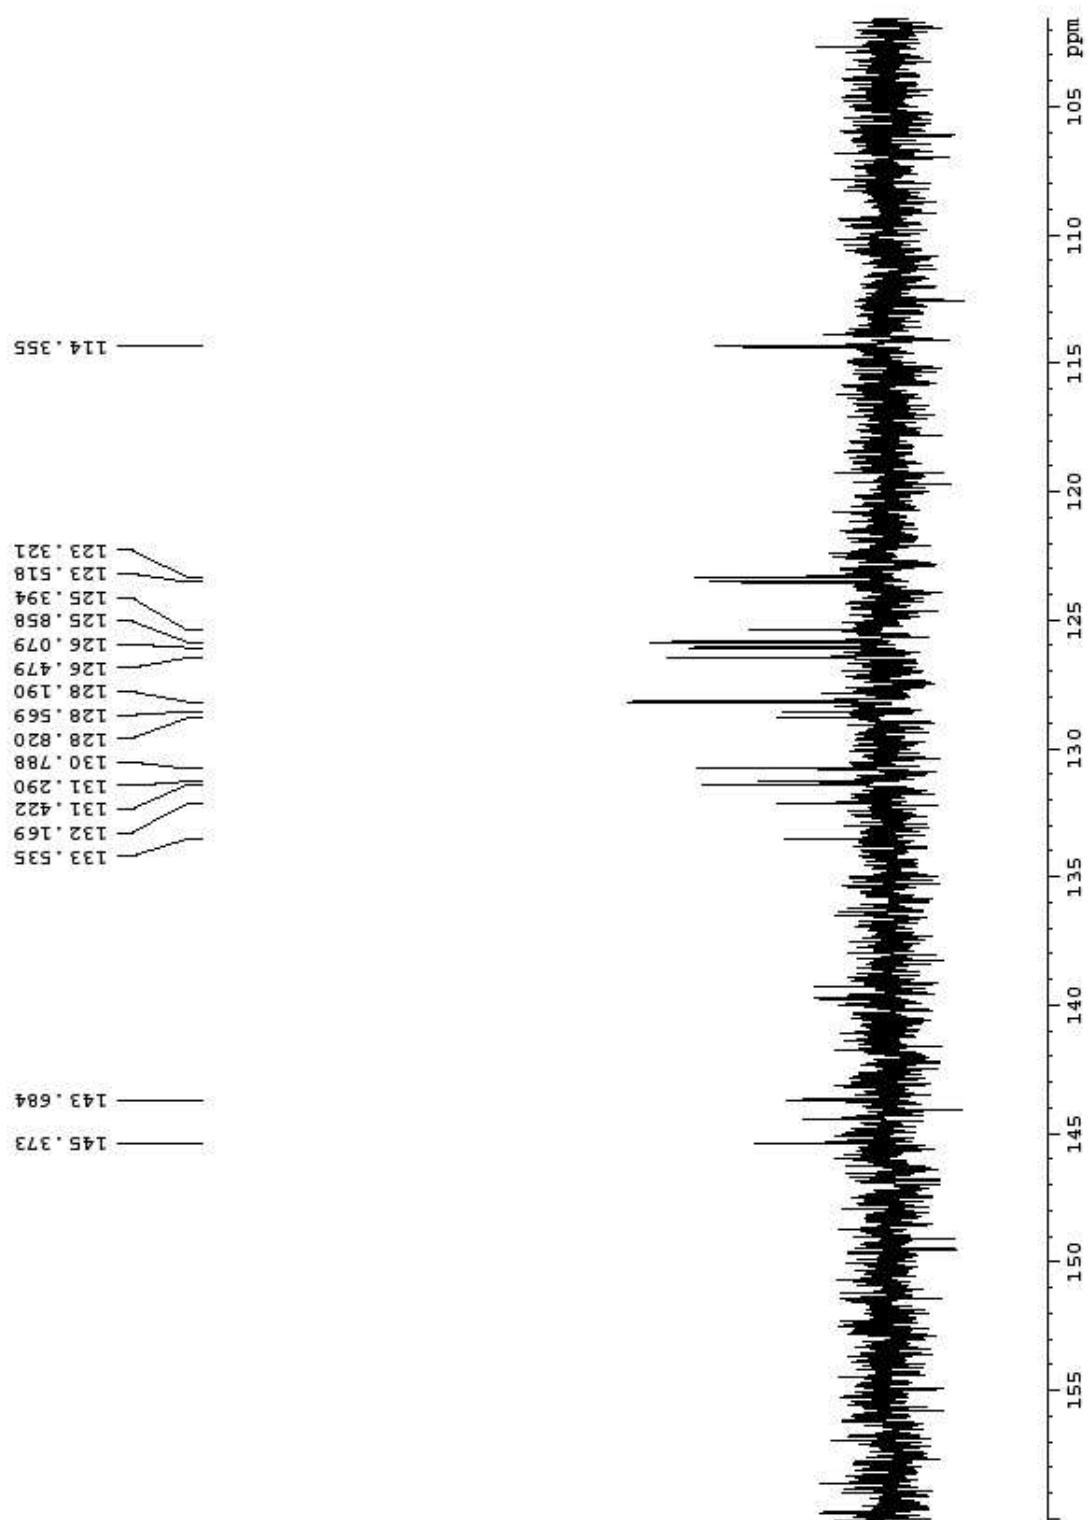

6-7-diaminodibenzo[a,c]phenazine 3

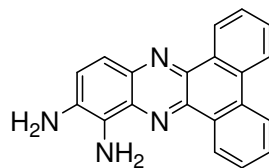

$^1\text{H}$  NMR (400 MHz, DMSO- $d_6$ )

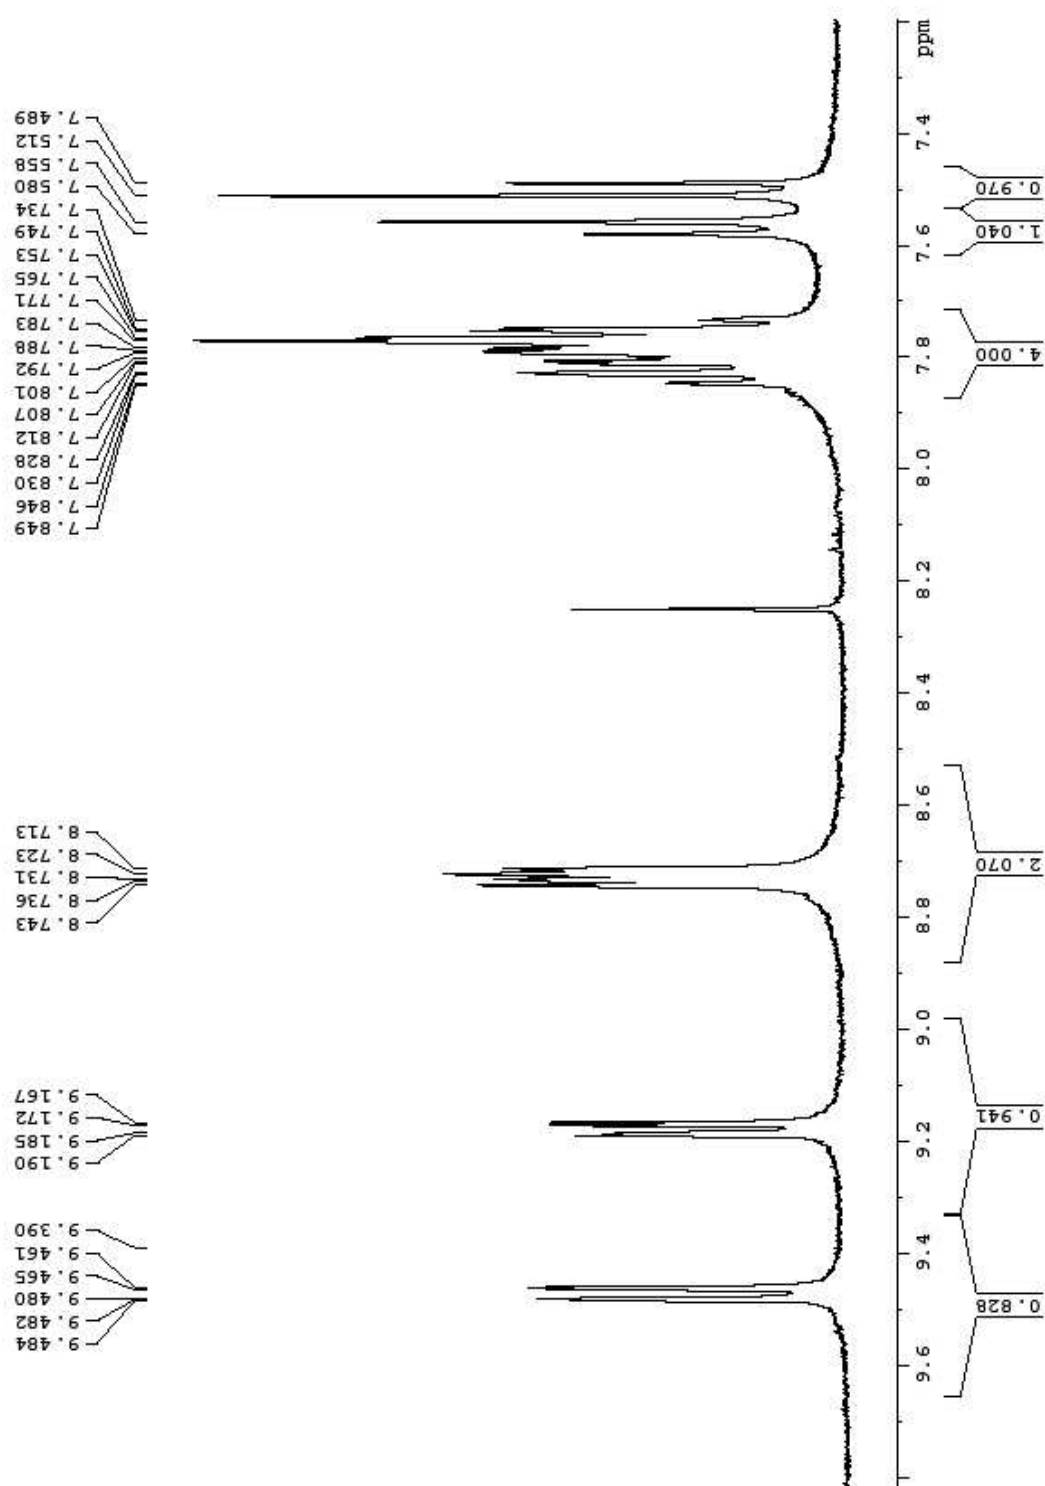

$^{13}\text{C}$  NMR (100 MHz, DMSO- $d_6$ )

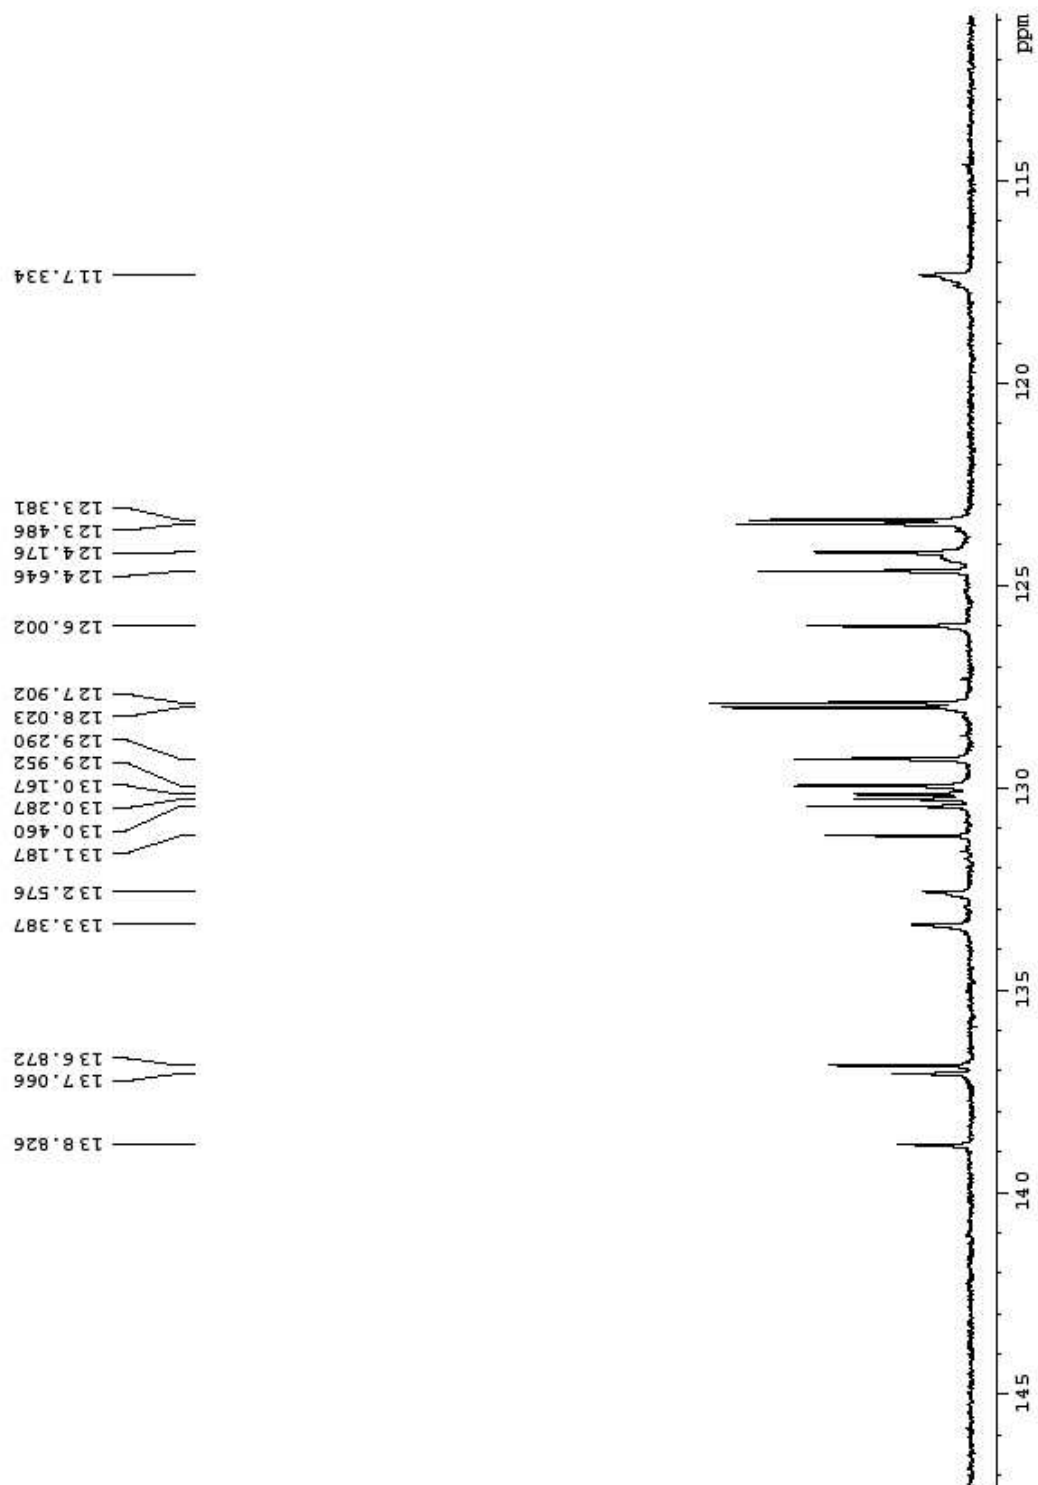

2-Ferrocenyl-3*H*-dibenzo[*a, c*]imidazo[4,5-*h*]phenazine 4

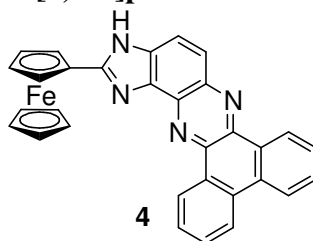

$^1\text{H}$  NMR (400 MHz, DMSO- $d_6$ )

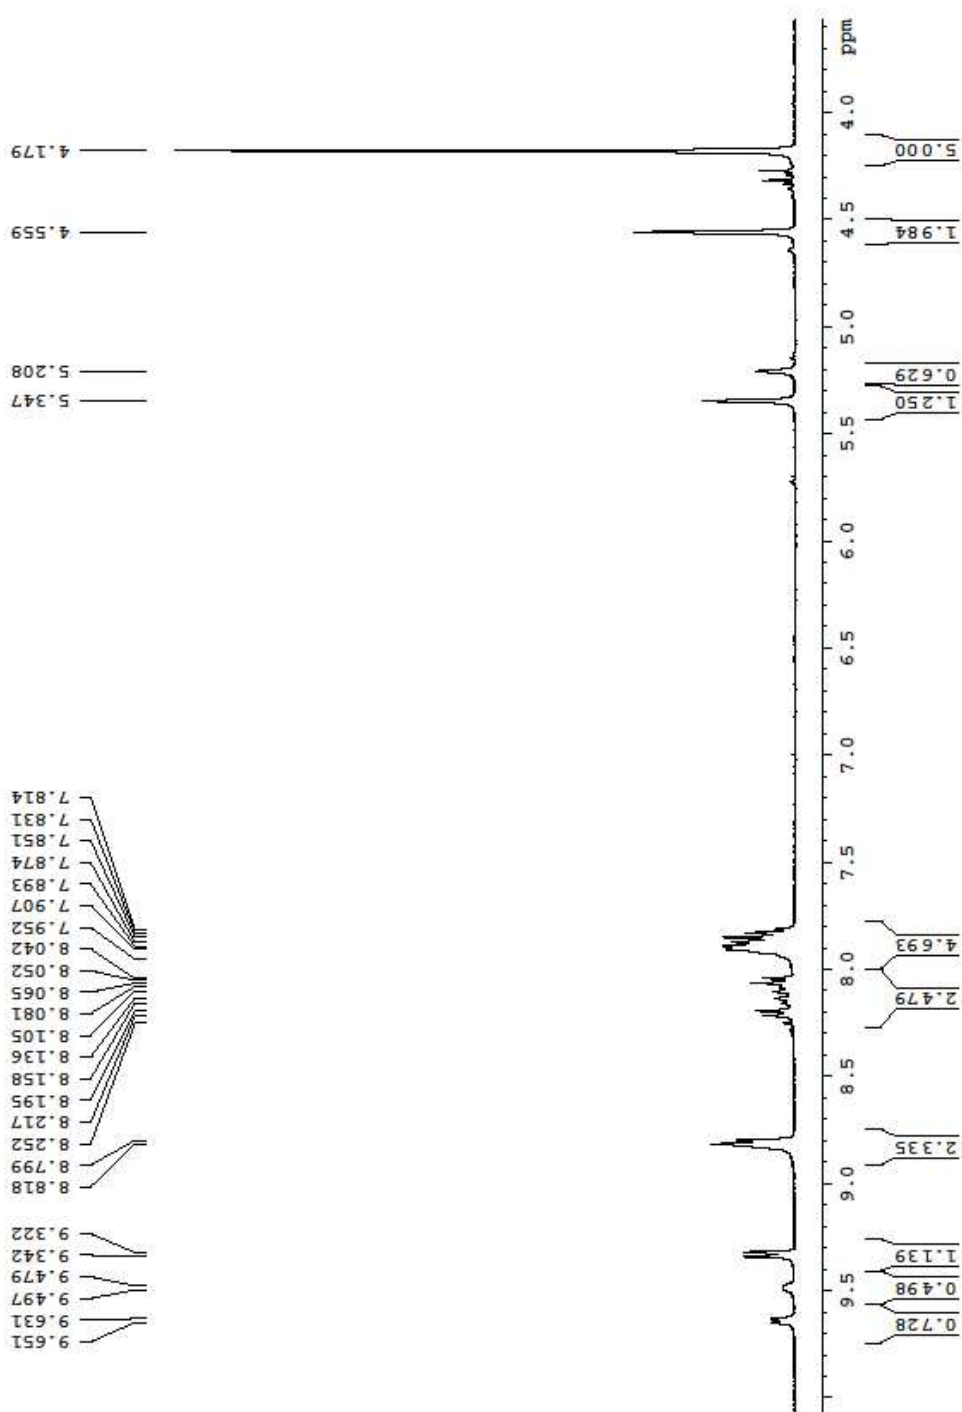



$^{13}\text{C}$  NMR (100 MHz, DMSO- $d_6$ )

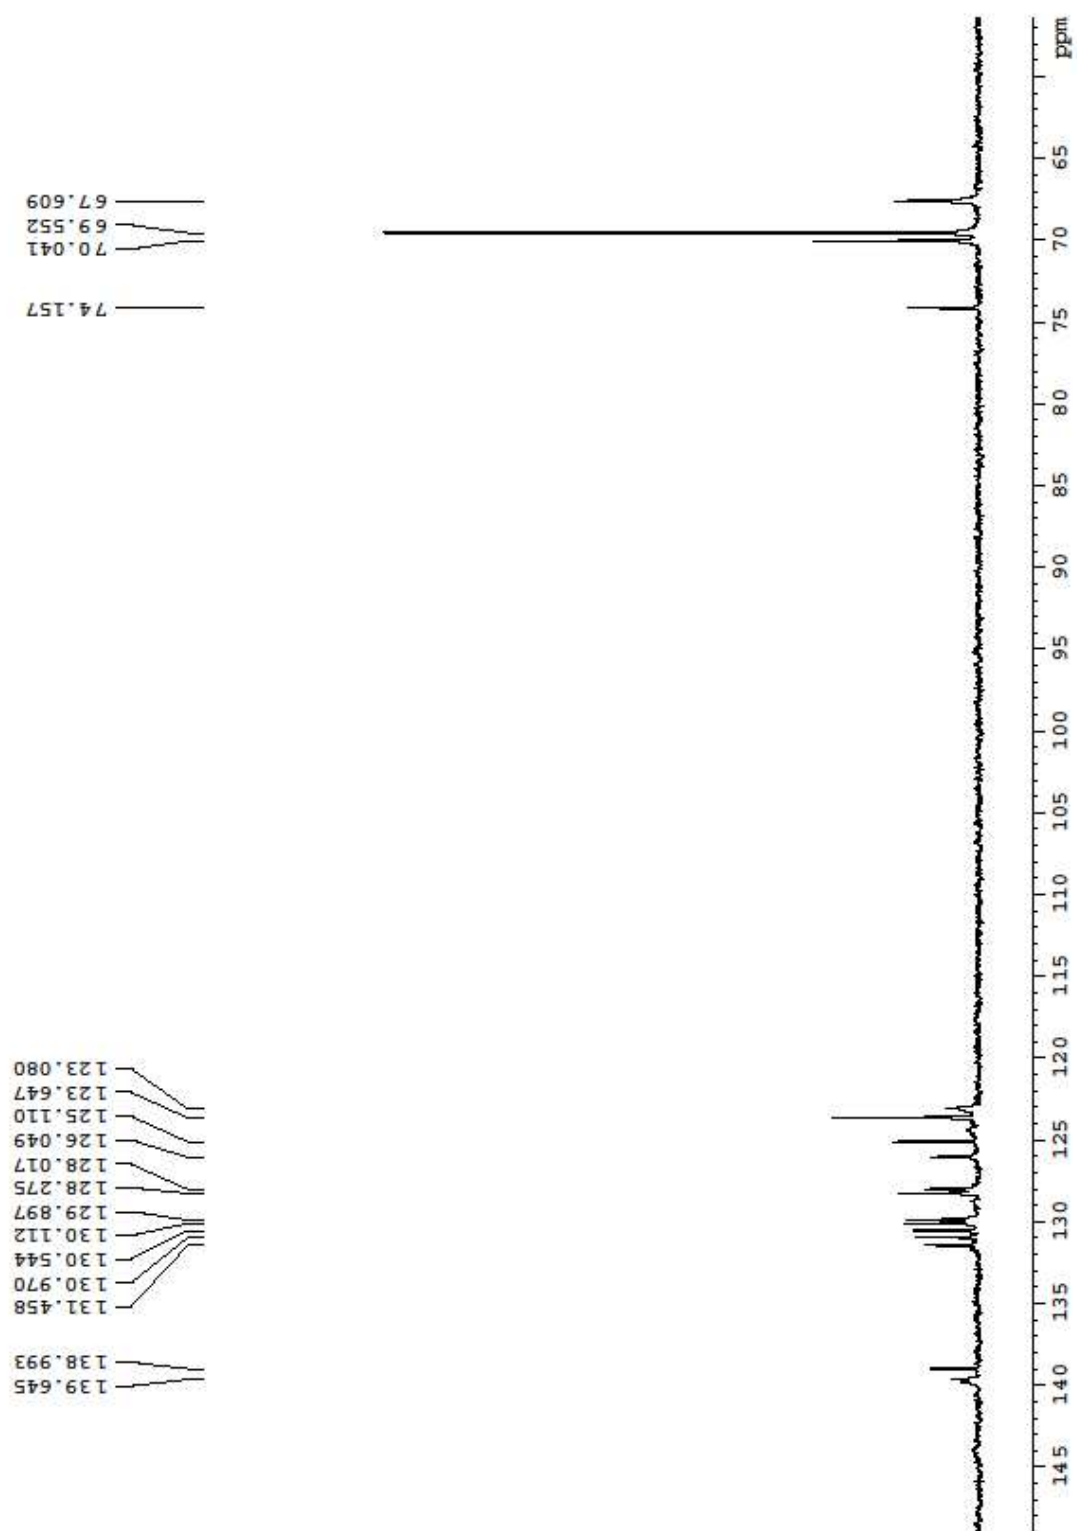

**2-Ferrocenyl-4,5-diamino-1H-benzo[d]imidazol 6**

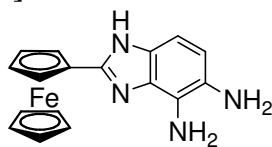

$^1\text{H}$  NMR (300 MHz, DMSO- $d_6$ )

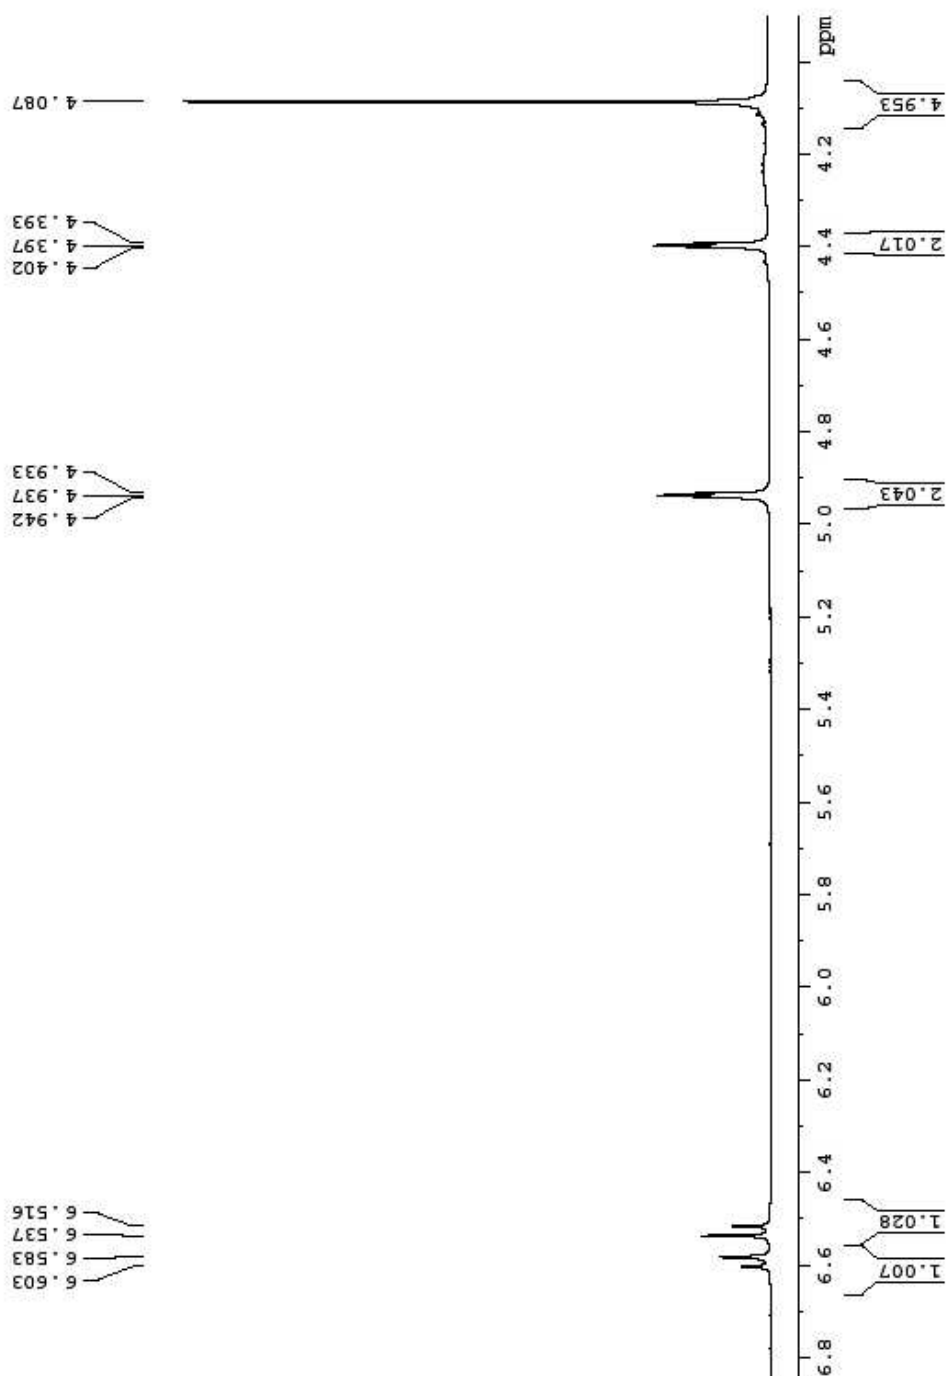

$^{13}\text{C}$  NMR (75MHz, DMSO- $\text{d}_6$ )

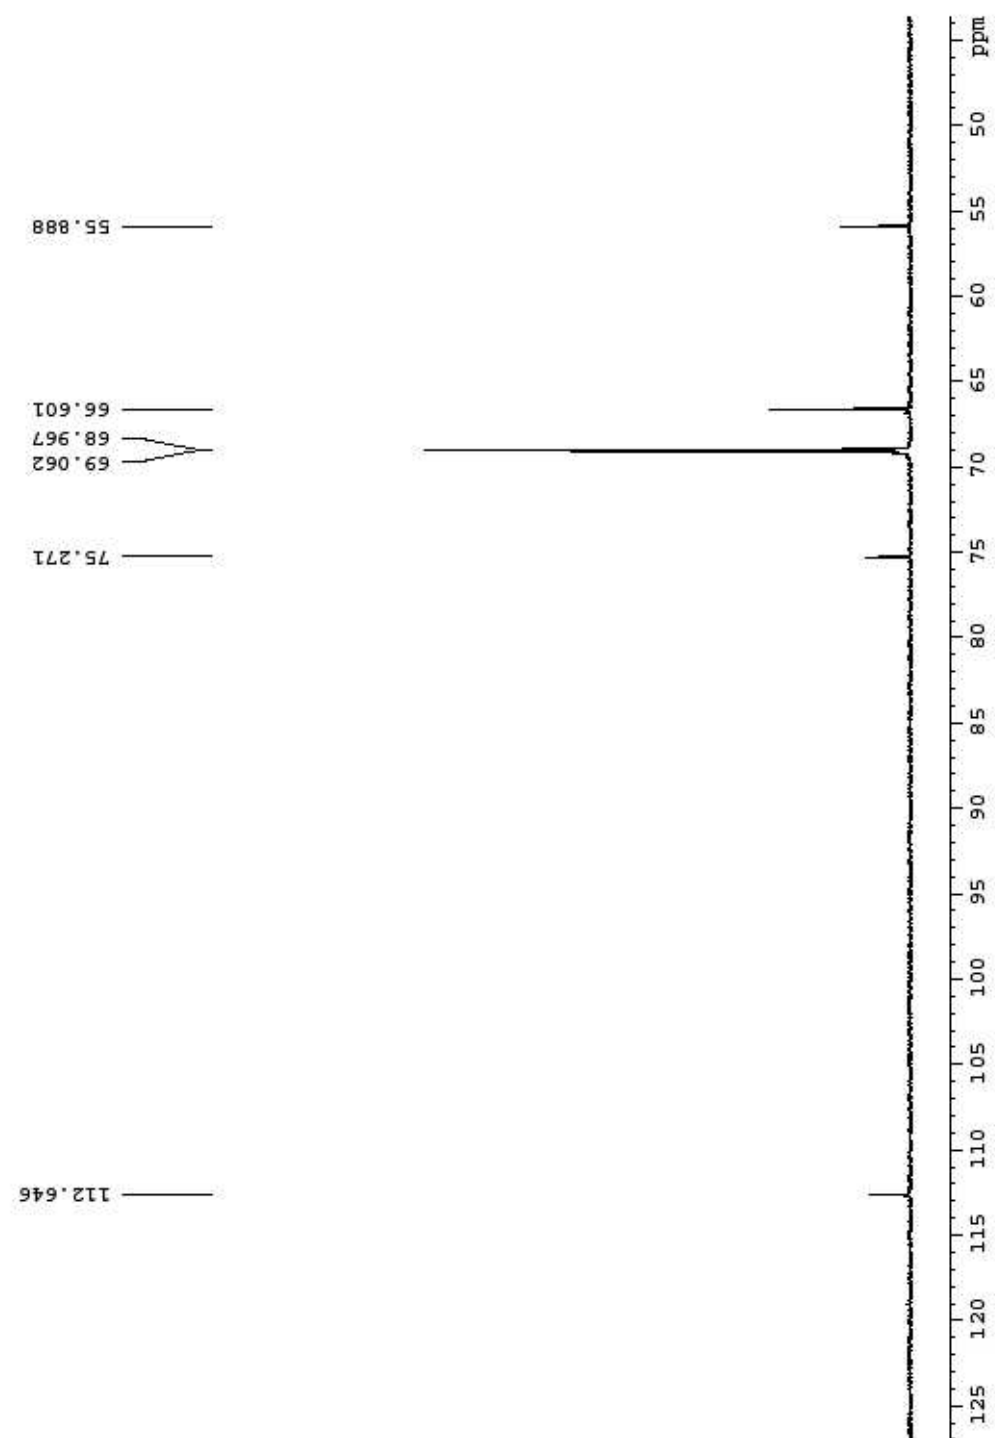

2-Ferrocenyl-3*H*-dipyrido[3,2-*a*:2',3'-*c*]imidazo[4,5-*h*]phenazine 7

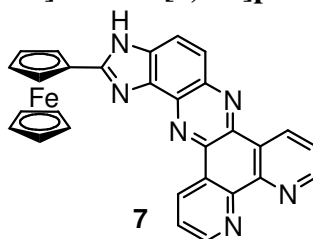

$^1\text{H}$  NMR (400 MHz, DMSO- $d_6$ )

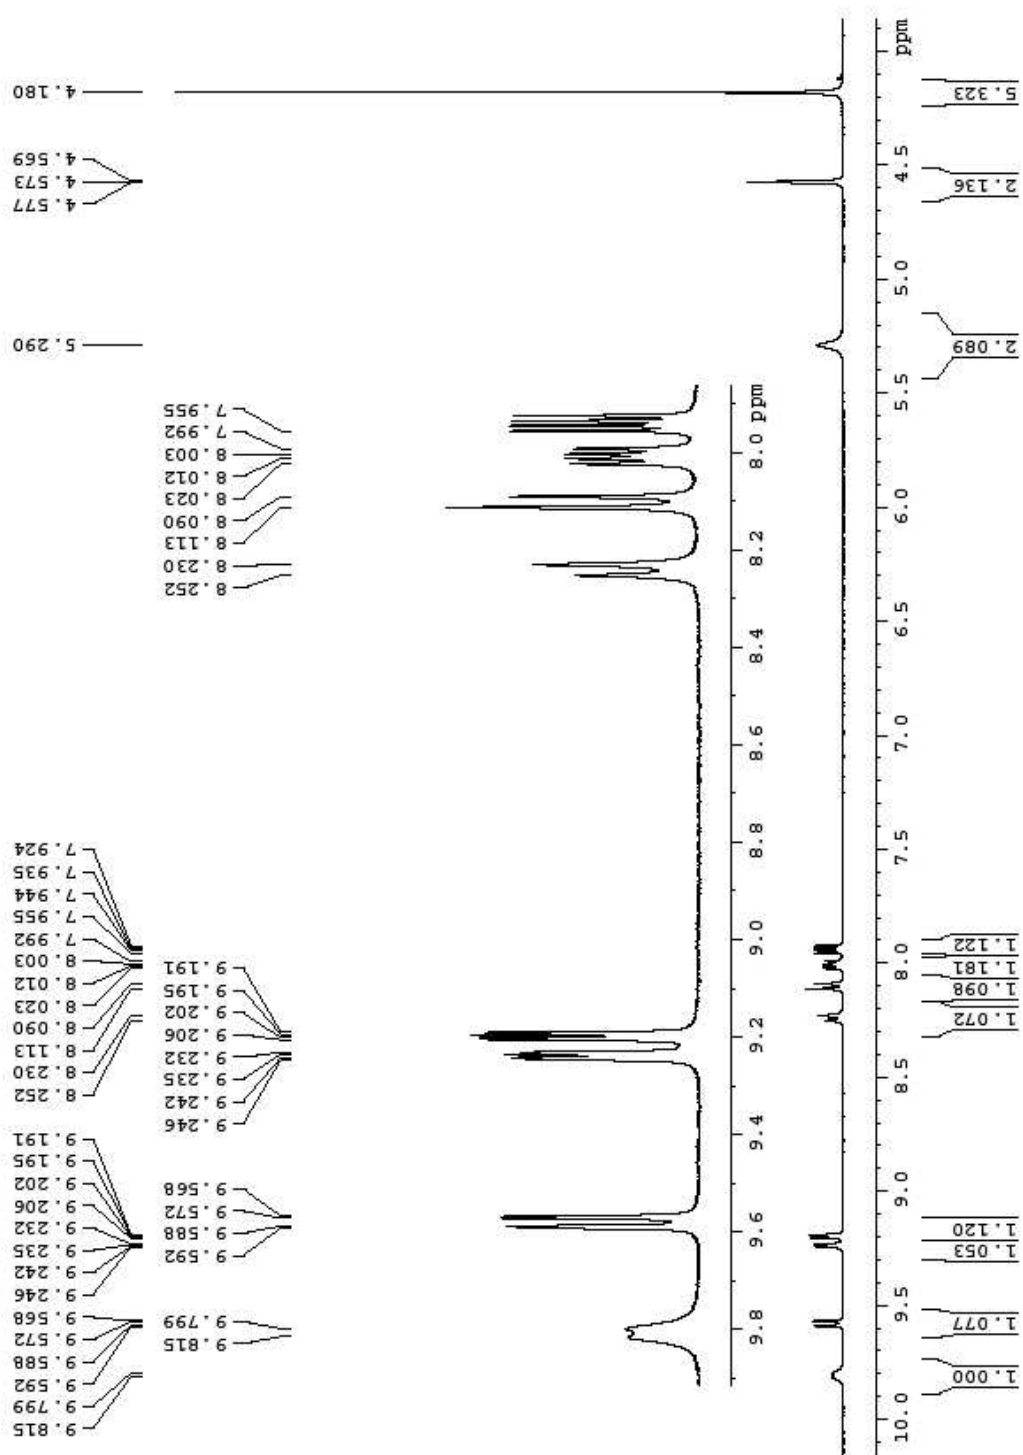

$^{13}\text{C}$  NMR (100 MHz, DMSO- $d_6$ )

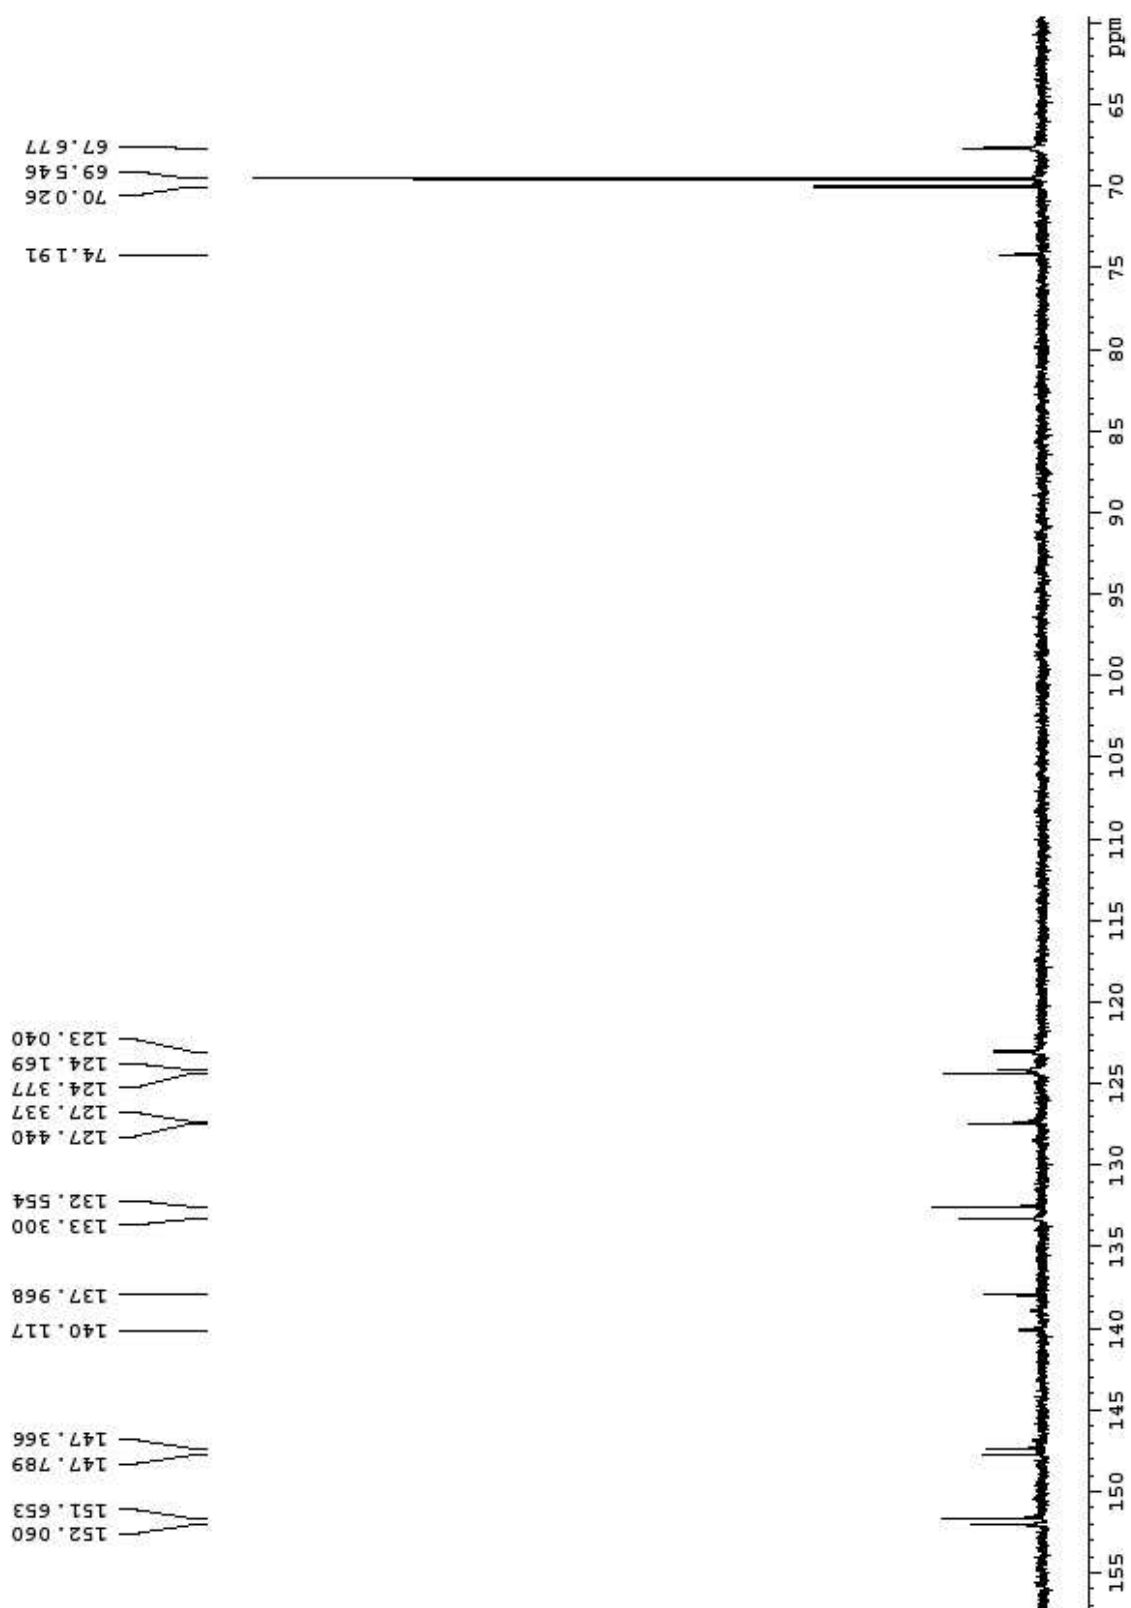

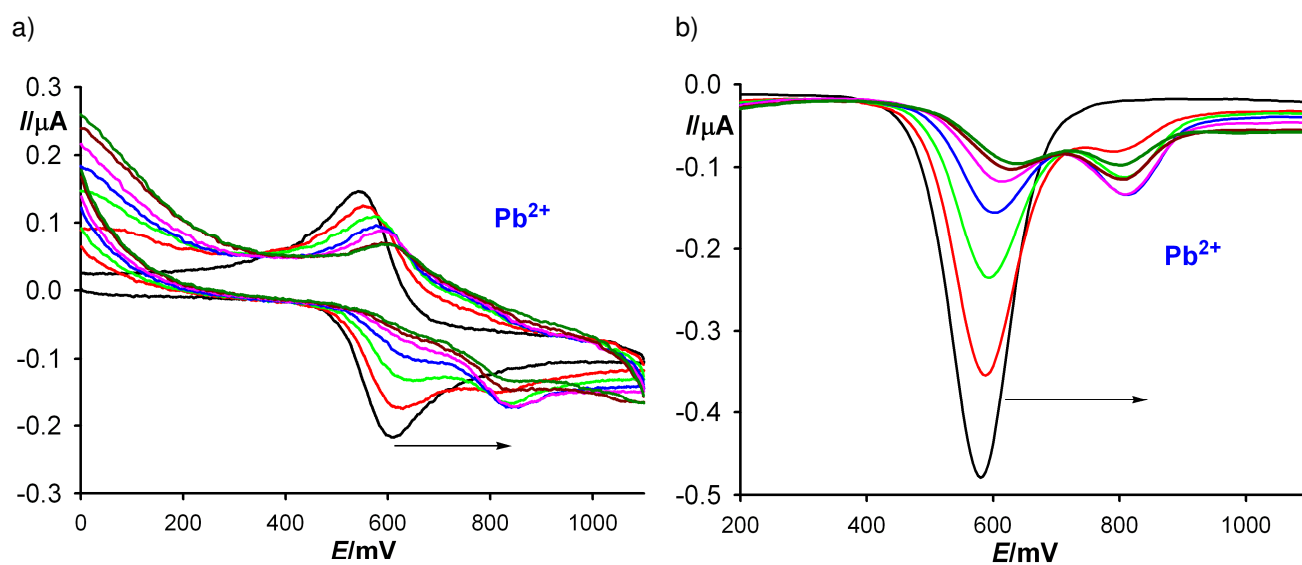

**Figure S1.** Evolution of the CV (a) and OSWV (b) of **4** ( $5 \times 10^{-4}$  M) in  $\text{CH}_3\text{CN}/[(\text{n-Bu})_4]\text{PF}_6$  scanned at  $0.1 \text{ V s}^{-1}$  in the presence of increasing amounts of  $\text{Pb}(\text{ClO}_4)_2$ .

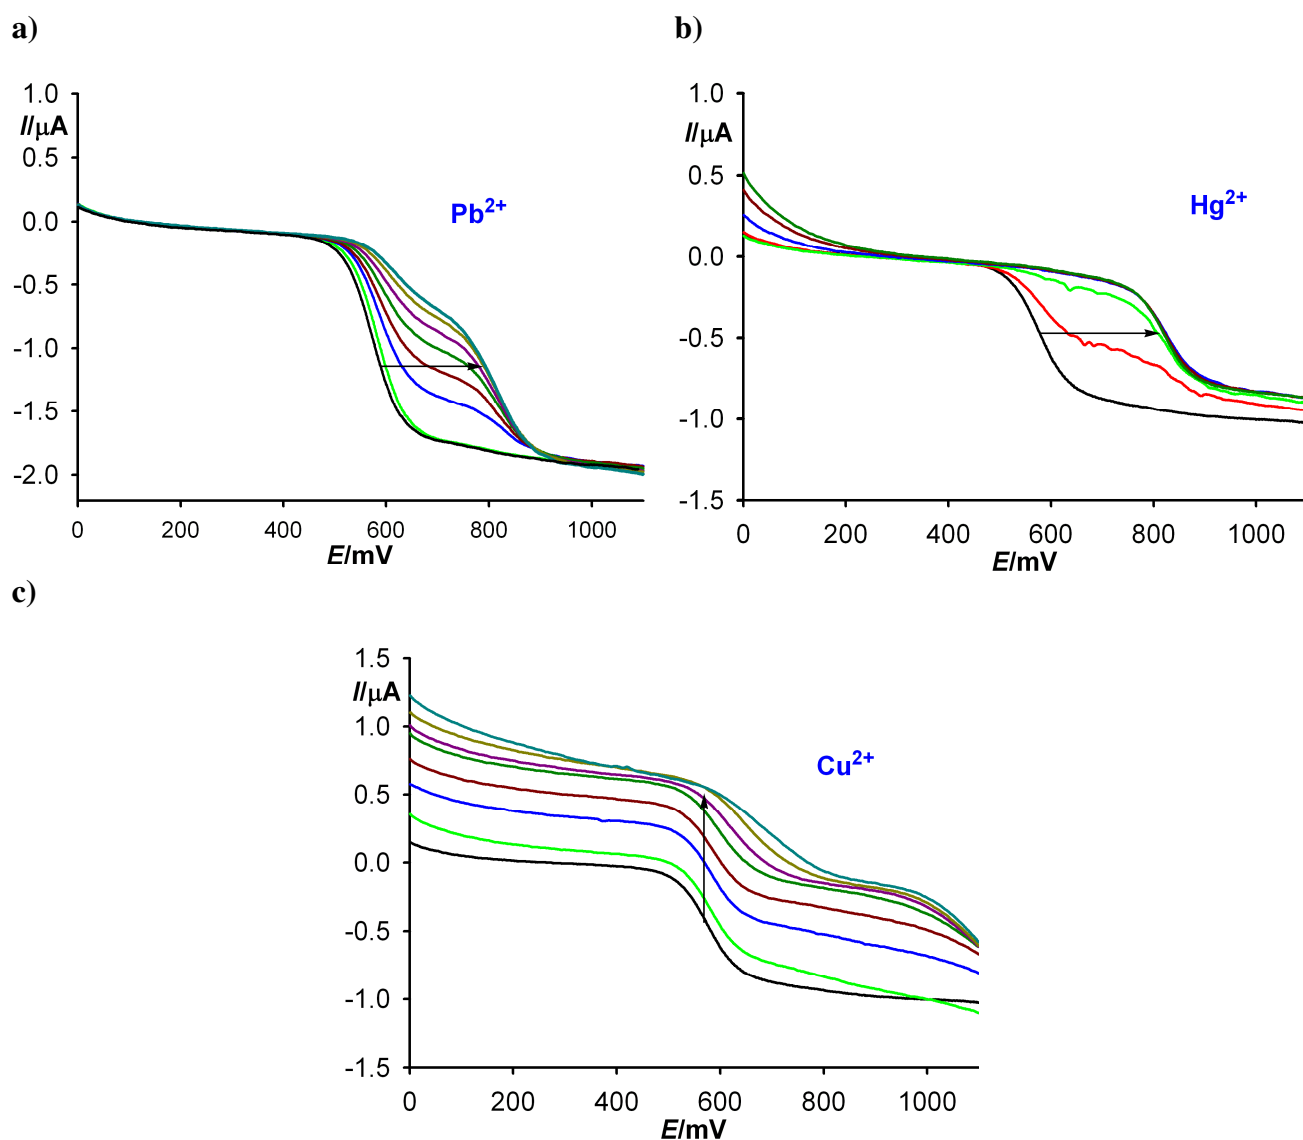

**Figure S2.** Evolution of the LSW of **4** ( $5 \times 10^{-4}$  M in  $\text{CH}_3\text{CN}$ ) in the presence of increasing amounts of (a)  $\text{Pb}(\text{ClO}_4)_2$ ; (b)  $\text{Hg}(\text{OTf})_2$ ; (c)  $\text{Cu}(\text{OTf})_2$ , obtained using a rotating disk electrode at  $100 \text{ mVs}^{-1}$  and 1000 rpm and  $[(\text{n-Bu})_4 \text{N}]\text{PF}_6$  0.1 M as supporting electrolyte.

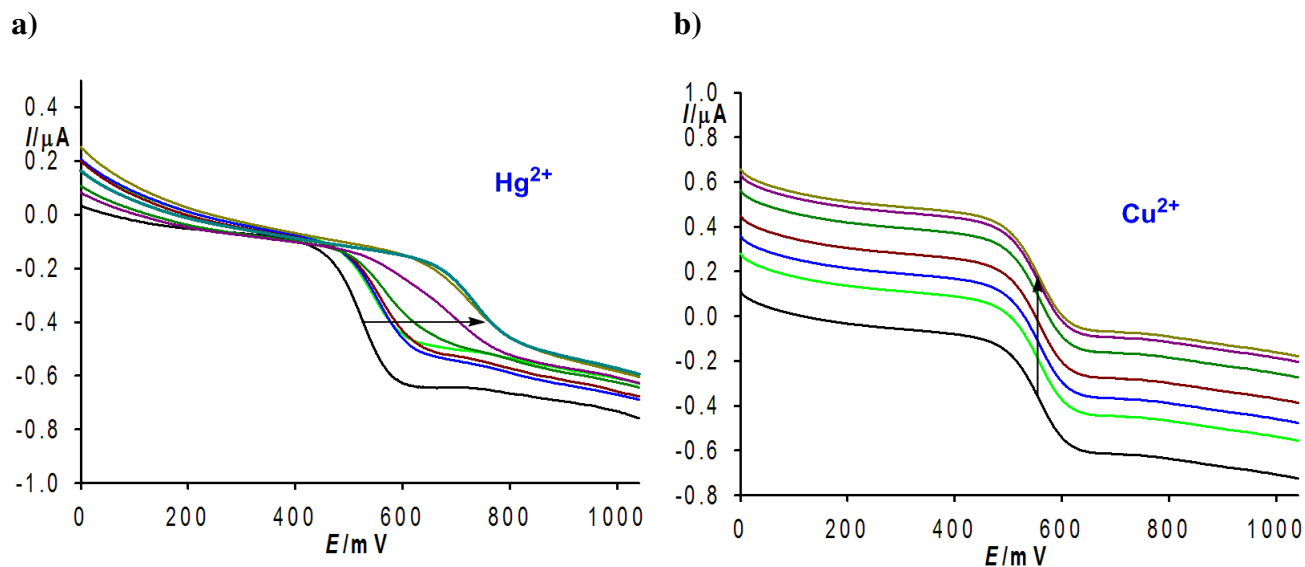

**Figure S3.** Evolution of the LSW of **7** ( $1 \times 10^{-4}$  M in  $\text{CH}_3\text{CN}$ ) in the presence of increasing amounts of (a)  $\text{Hg}(\text{OTf})_2$ ; (b)  $\text{Cu}(\text{OTf})_2$ , obtained using a rotating disk electrode at  $100 \text{ mVs}^{-1}$  and 1000 rpm and  $[(\text{n-Bu})_4 \text{N}]\text{PF}_6$  0.1 M as supporting electrolyte.

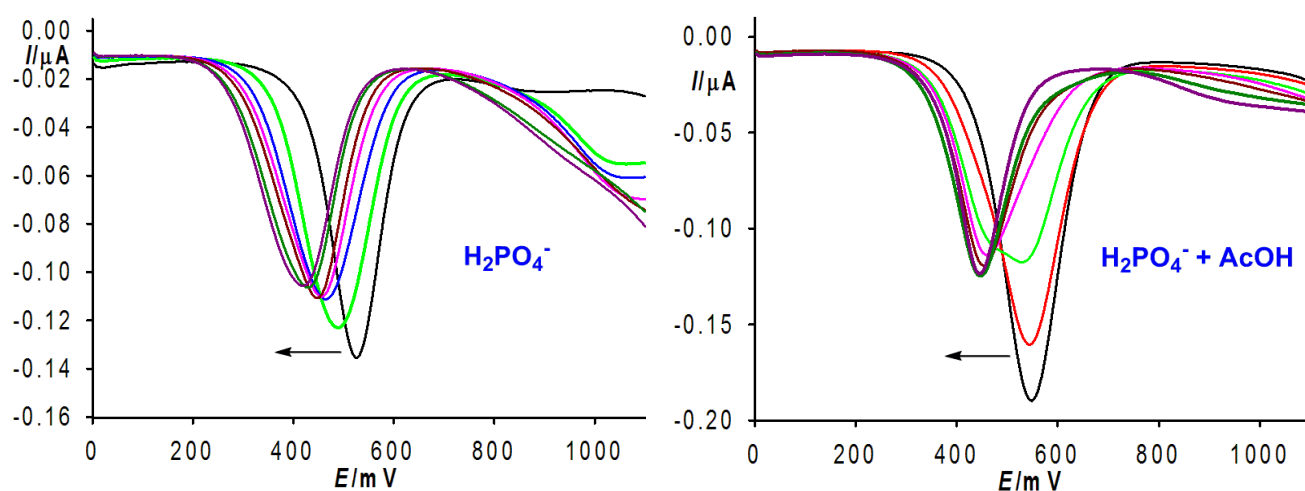

**Figure S4.** Evolution of the OSWV of **4** ( $5 \times 10^{-4}$  M) in  $\text{CH}_3\text{CN}/[(\text{n-Bu})_4 \text{N}]\text{PF}_6$  scanned at  $0.1 \text{ V s}^{-1}$  in the presence of increasing amounts of (a)  $\text{H}_2\text{PO}_4^-$  until 3 equiv (left) and in the presence of 3 equiv. of  $\text{H}_2\text{PO}_4^-$  and 20 equiv of acetic acid (right).



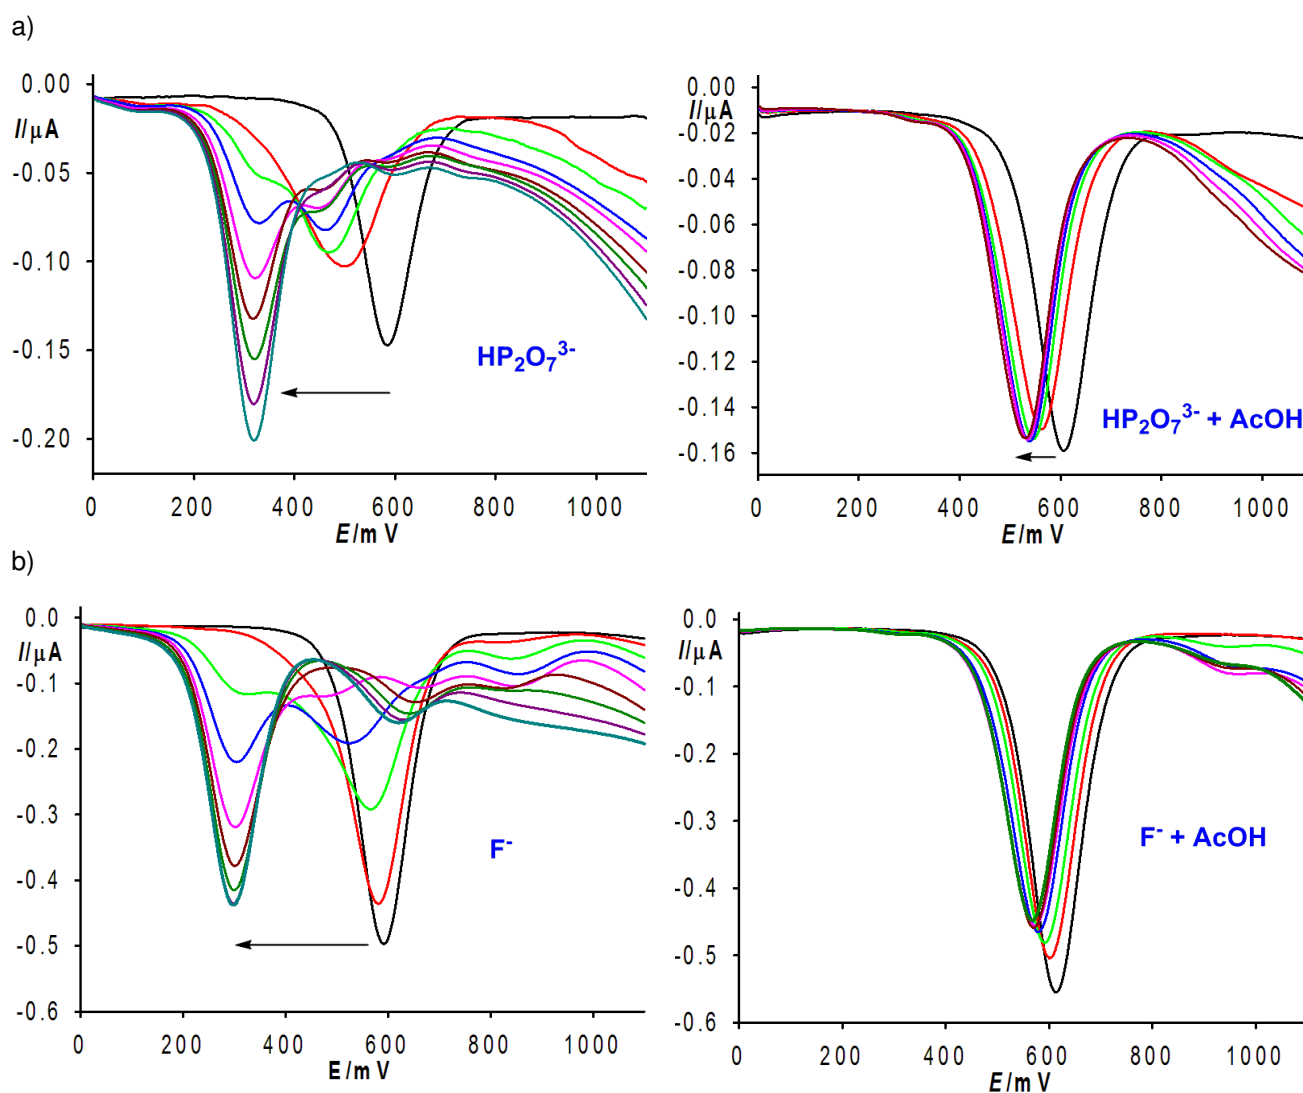

**Figure S5.** Evolution of the OSWV of **4** ( $5 \cdot 10^{-4}$  M) in  $\text{CH}_3\text{CN}/[(\text{n-Bu})_4\text{N}]\text{PF}_6$  scanned at  $0.1 \text{ V s}^{-1}$  in the presence of increasing amounts of: (a)  $\text{HP}_2\text{O}_7^{3-}$  (left) until 3 equiv. and in the presence of 3 equiv. of  $\text{HP}_2\text{O}_7^{3-}$  and 20 equiv. of acetic acid (right); (b)  $\text{F}^-$  until 3 equiv. (left) and in the presence of 3 equiv. of  $\text{F}^-$  and 20 equiv. of acetic acid (right).

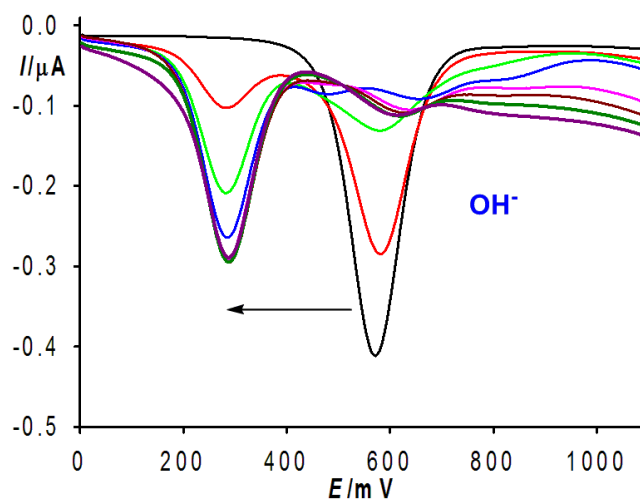

**Figure S6.** Evolution of the OSWV of **4** ( $5 \times 10^{-4}$  M) in  $\text{CH}_3\text{CN}/[(\text{n-Bu})_4 \text{N}]\text{PF}_6$  scanned at  $0.1 \text{ V s}^{-1}$  in the presence of increasing amounts of  $\text{OH}^-$  until 2 equiv.

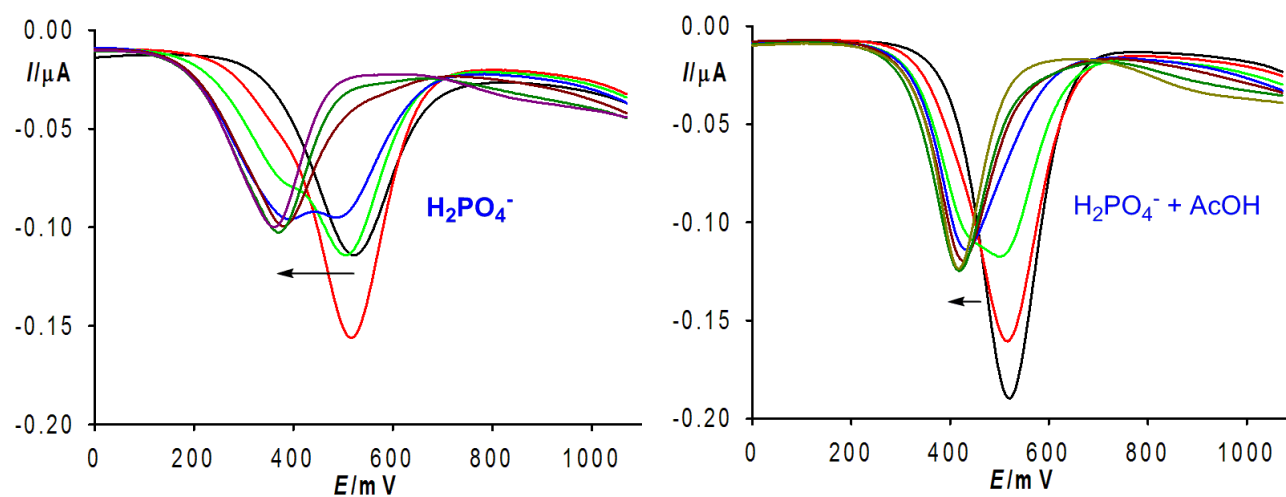

**Figure S7.** Evolution of the OSWV of **7** ( $1 \times 10^{-4}$  M) in  $\text{CH}_3\text{CN}/[(\text{n-Bu})_4 \text{N}]\text{PF}_6$  scanned at  $0.1 \text{ V s}^{-1}$  in the presence of increasing amounts of  $\text{H}_2\text{PO}_4^-$  until 3 equiv. (left) and in the presence of 20 equiv. of acetic acid (right).

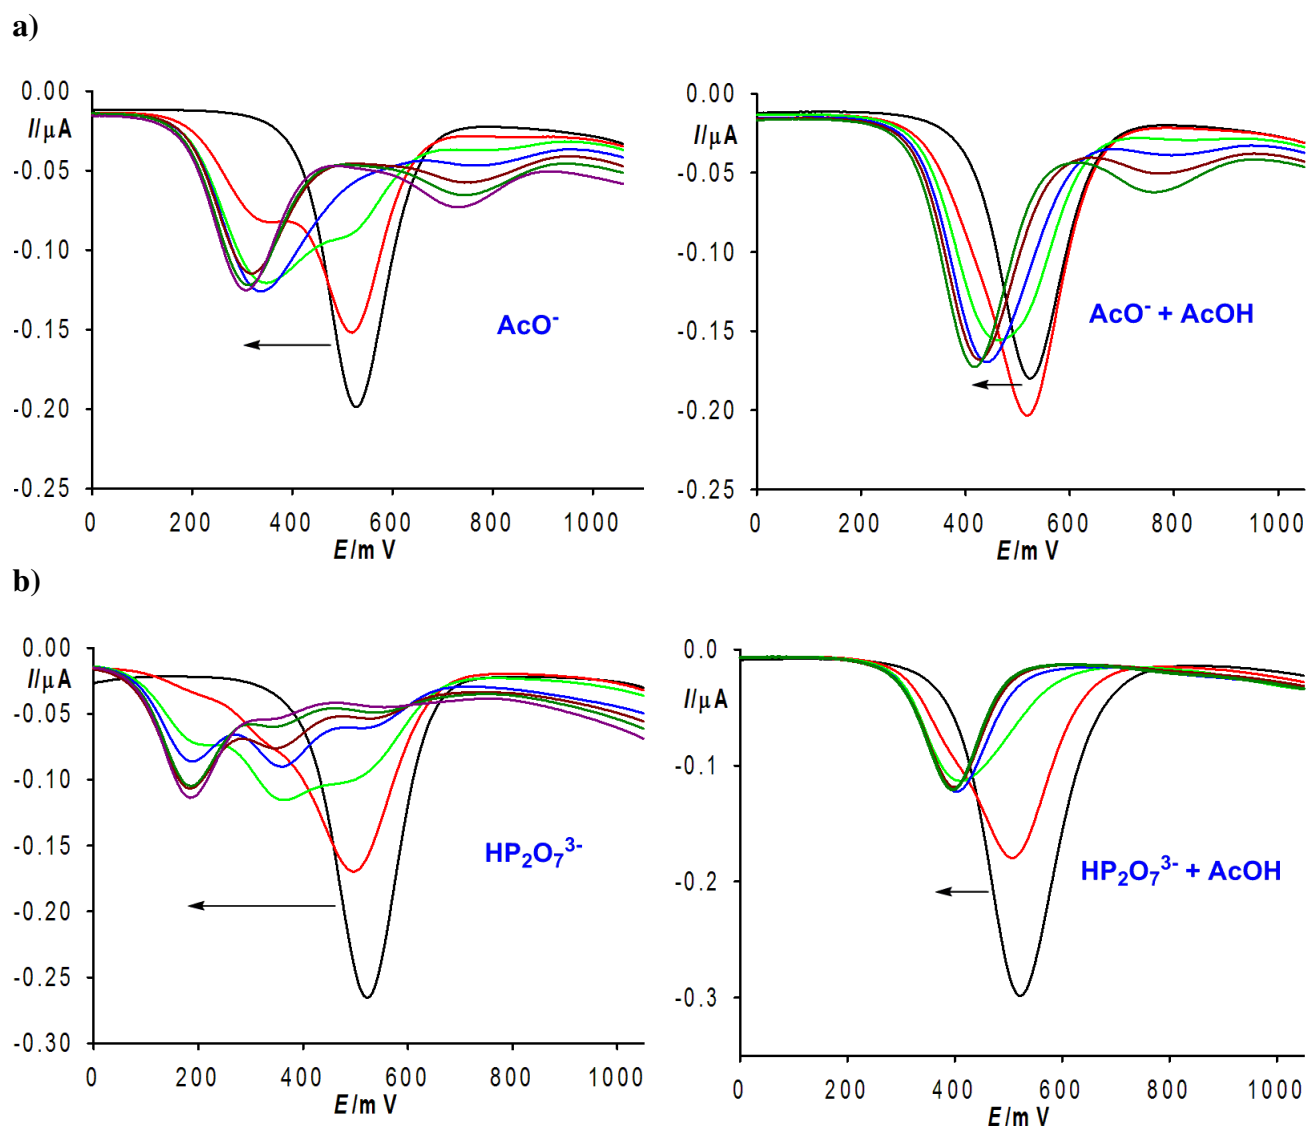

**Figure S8.** (a) Evolution of the OSWV of **7** ( $1 \times 10^{-4}$  M) in  $\text{CH}_3\text{CN}/[(\text{n-Bu})_4\text{N}]\text{PF}_6$  scanned at  $0.1 \text{ V s}^{-1}$  in the presence of increasing amounts of (a)  $\text{AcO}^-$  until 3 equiv (left) and in the presence of 3 equiv. of  $\text{AcO}^-$  and 20 equiv of acetic acid (right); (b)  $\text{HP}_2\text{O}_7^{3-}$  until 3 equiv (left) and in the presence of 3 equiv. of  $\text{HP}_2\text{O}_7^{3-}$  and 20 equiv of acetic acid (right).

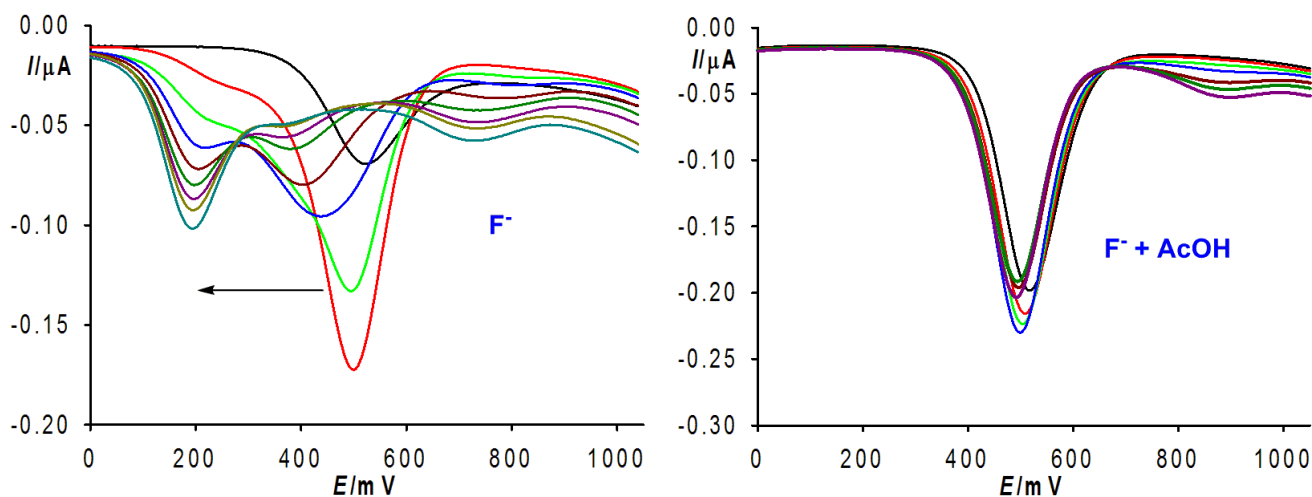

**Figure S9.** Evolution of the OSWV of **7** ( $1 \times 10^{-4}$  M) in  $\text{CH}_3\text{CN}/[(\text{n-Bu})_4 \text{N}]\text{PF}_6$  scanned at  $0.1 \text{ V s}^{-1}$  in the presence of increasing amounts of  $\text{F}^-$  (left) until 3 equiv. and in the presence of 3 equiv. of  $\text{F}^-$  and 20 equiv of acetic acid (right).

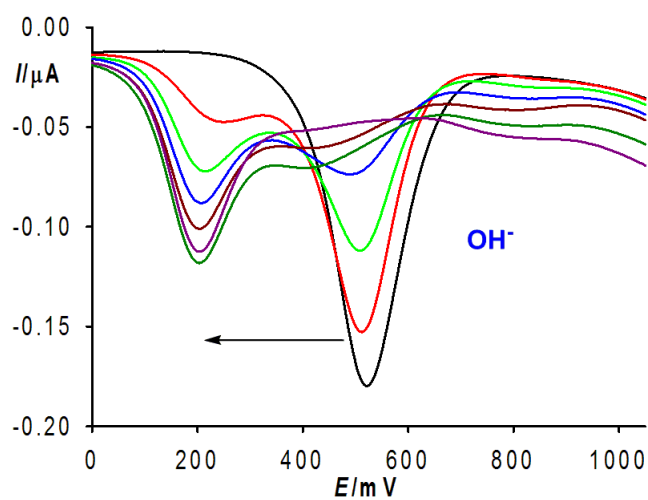

**Figure S10.** Evolution of the OSWV of **7** ( $1 \times 10^{-4}$  M) in  $\text{CH}_3\text{CN}/[(\text{n-Bu})_4 \text{N}]\text{PF}_6$  scanned at  $0.1 \text{ V s}^{-1}$  in the presence of increasing amounts of  $\text{OH}^-$  until 2 equiv.

**Table SI 1.** Electrochemical data of receptor **4** and **7** in the presence of anions.

| Receptor | Anion added                                  | $E_{1/2}$ (V)     | Acid added <sup>d</sup> | $\Delta E_{1/2}$ (mV) |
|----------|----------------------------------------------|-------------------|-------------------------|-----------------------|
| <b>4</b> |                                              | 0.58              |                         |                       |
| <b>4</b> | AcO <sup>-</sup>                             | 0.46 <sup>a</sup> | no                      | -120                  |
| <b>4</b> | AcO <sup>-</sup>                             | 0.51 <sup>a</sup> | yes                     | -70                   |
| <b>4</b> | H <sub>2</sub> PO <sub>4</sub> <sup>-</sup>  | 0.47 <sup>a</sup> | no                      | -110                  |
| <b>4</b> | H <sub>2</sub> PO <sub>4</sub> <sup>-</sup>  | 0.51 <sup>a</sup> | yes                     | -70                   |
| <b>4</b> | HP <sub>2</sub> O <sub>7</sub> <sup>3-</sup> | 0.46 <sup>b</sup> | no                      | -120                  |
| <b>4</b> | HP <sub>2</sub> O <sub>7</sub> <sup>3-</sup> | 0.29 <sup>a</sup> | no                      | -290                  |
| <b>4</b> | HP <sub>2</sub> O <sub>7</sub> <sup>3-</sup> | 0.50 <sup>a</sup> | yes                     | -80                   |
| <b>4</b> | F <sup>-</sup>                               | 0.29 <sup>a</sup> | no                      | -290                  |
| <b>4</b> | F <sup>-</sup>                               | 0.58 <sup>a</sup> | yes                     | 0                     |
| <b>4</b> | OH <sup>-</sup>                              | 0.29 <sup>c</sup> |                         | -290                  |
| <b>7</b> |                                              | 0.52              |                         |                       |
| <b>7</b> | AcO <sup>-</sup>                             | 0.30 <sup>a</sup> | no                      | -220                  |
| <b>7</b> | AcO <sup>-</sup>                             | 0.41 <sup>a</sup> | yes                     | -110                  |
| <b>7</b> | H <sub>2</sub> PO <sub>4</sub> <sup>-</sup>  | 0.36 <sup>a</sup> | no                      | -160                  |
| <b>7</b> | H <sub>2</sub> PO <sub>4</sub> <sup>-</sup>  | 0.42 <sup>a</sup> | yes                     | -100                  |
| <b>7</b> | HP <sub>2</sub> O <sub>7</sub> <sup>3-</sup> | 0.35 <sup>b</sup> | no                      | -170                  |
| <b>7</b> | HP <sub>2</sub> O <sub>7</sub> <sup>3-</sup> | 0.19 <sup>a</sup> | no                      | -330                  |
| <b>7</b> | HP <sub>2</sub> O <sub>7</sub> <sup>3-</sup> | 0.39 <sup>a</sup> | yes                     | -130                  |
| <b>7</b> | F <sup>-</sup>                               | 0.19 <sup>a</sup> | no                      | -330                  |
| <b>7</b> | F <sup>-</sup>                               | 0.52 <sup>a</sup> | yes                     | 0                     |
| <b>7</b> | OH <sup>-</sup>                              | 0.19 <sup>c</sup> |                         | -330                  |

<sup>a</sup>: 3 equiv added; <sup>b</sup>: 1 equiv added; <sup>c</sup>: 2 equiv added; <sup>d</sup>: 20 equiv of acetic acid added

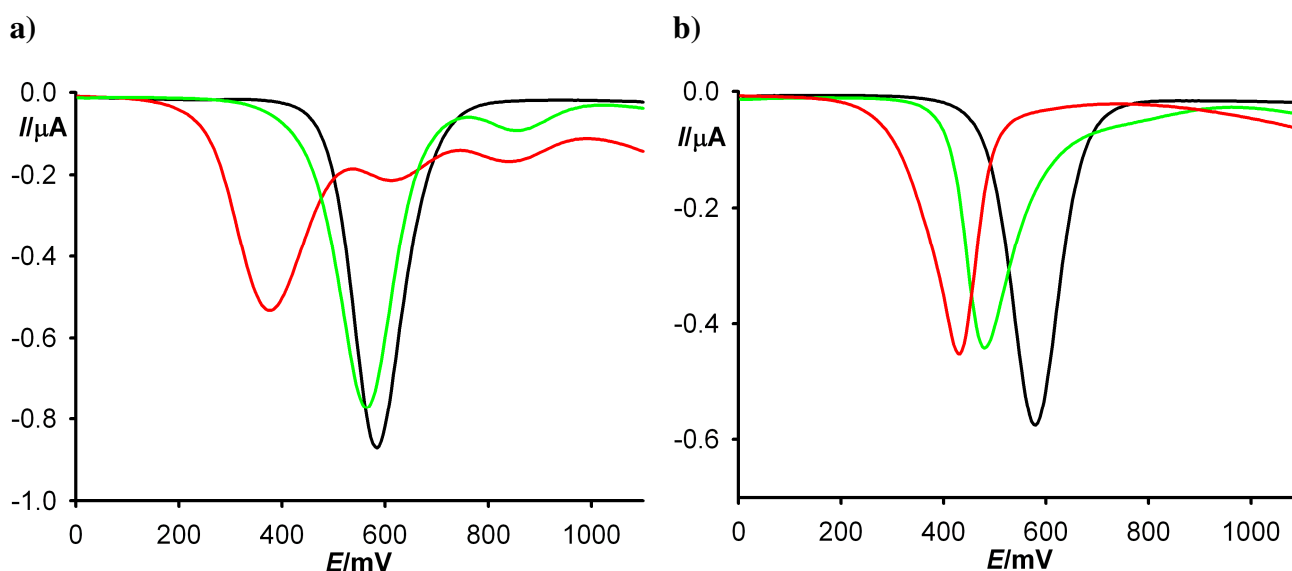

**Figure S11.** (a) Evolution of the OSWV of **4** (black) ( $5 \times 10^{-4}$  M in CH<sub>3</sub>CN) [(n-Bu)<sub>4</sub> N]PF<sub>6</sub> scanned at  $0.1 \text{ V s}^{-1}$  in the presence of 3 equiv of AcO<sup>-</sup> (red) and in the presence of 3 equiv of AcO<sup>-</sup> and 1 equiv of Pb<sup>2+</sup> (green). (b) Evolution of the OSWV of **4** (black) ( $5 \times 10^{-4}$  M in CH<sub>3</sub>CN) [(n-Bu)<sub>4</sub> N]PF<sub>6</sub>] scanned at  $0.1 \text{ V s}^{-1}$  in the presence of 3 equiv of H<sub>2</sub>PO<sub>4</sub><sup>-</sup> (red) and in the presence of 3 equiv of H<sub>2</sub>PO<sub>4</sub><sup>-</sup> and 1 equiv of Pb<sup>2+</sup> (green).

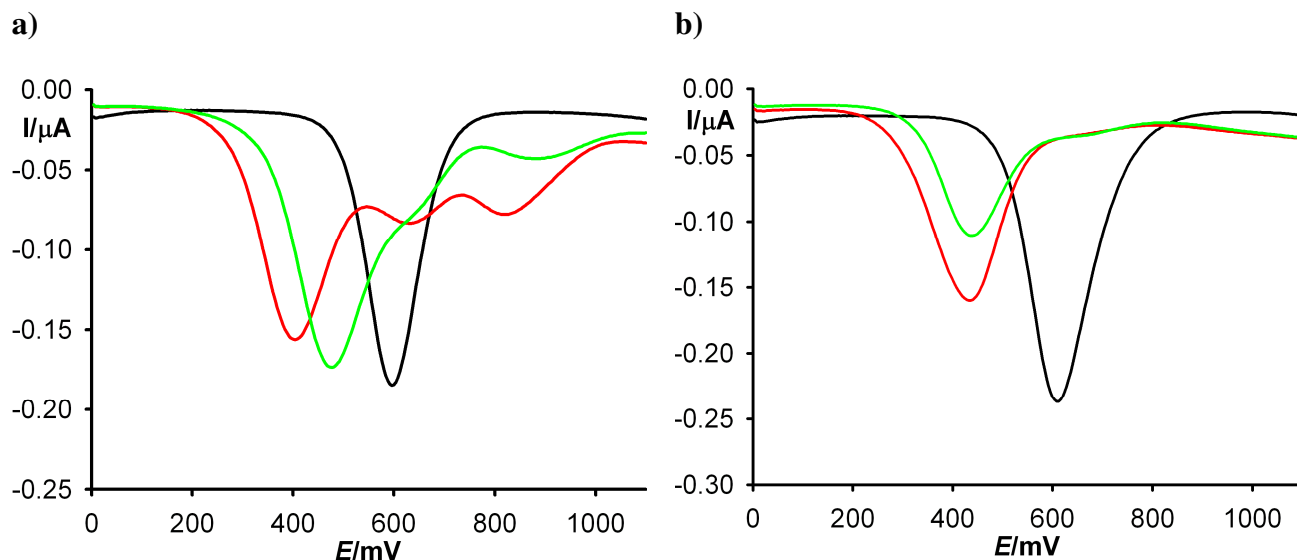

**Figure S12.** (a) Evolution of the OSWV of **7** (black) ( $5 \times 10^{-4}$  M in CH<sub>3</sub>CN) [(n-Bu)<sub>4</sub> N]PF<sub>6</sub>] scanned at  $0.1 \text{ V s}^{-1}$  in the presence of 3 equiv of AcO<sup>-</sup> (red) and in the presence of 3 equiv of AcO<sup>-</sup> and 0.5 equiv of Hg<sup>2+</sup> (green). (b) Evolution of the OSWV of **7** (black) ( $5 \cdot 10^{-4}$  M in CH<sub>3</sub>CN) [(n-Bu)<sub>4</sub> N]PF<sub>6</sub>] scanned at  $0.1 \text{ V s}^{-1}$  in the presence of 3 equiv of H<sub>2</sub>PO<sub>4</sub><sup>-</sup> (red) and in the presence of 3 equiv of H<sub>2</sub>PO<sub>4</sub><sup>-</sup> and 0.5 equiv of Hg<sup>2+</sup> (green).

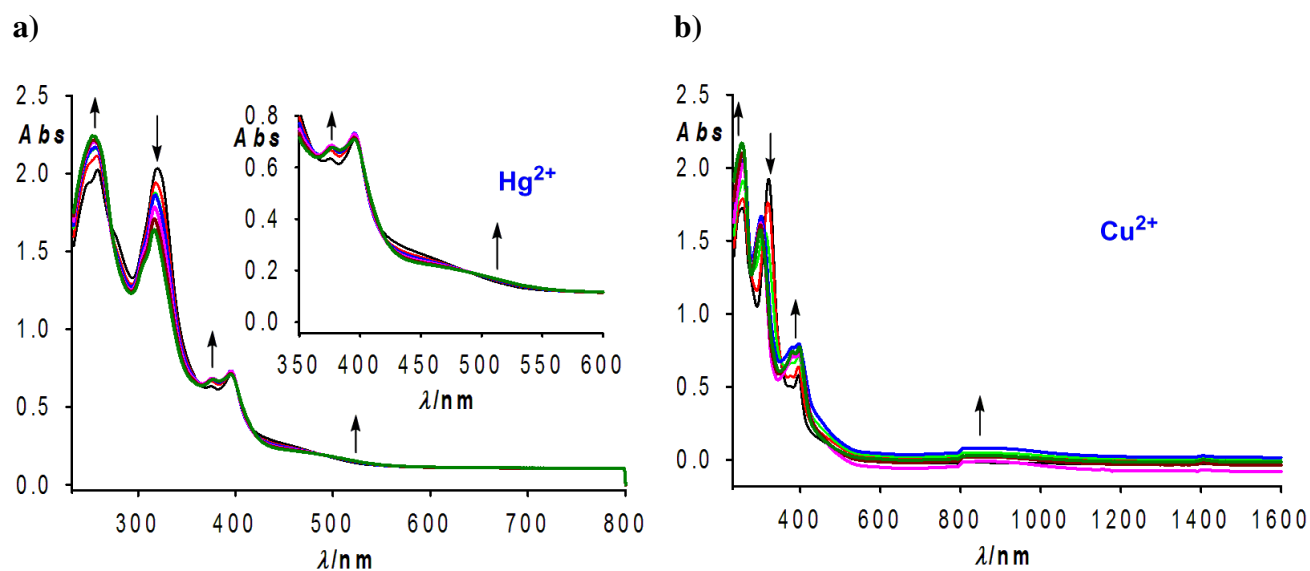

**Figure S13.** Changes in the absorption spectra of **4** ( $c = 5 \cdot 10^{-5}$  M in CH<sub>3</sub>CN) upon addition of increasing amounts of (a) Hg(OTf)<sub>2</sub>; (b) Cu(OTf)<sub>2</sub>, until 1 equiv was added. Arrows indicate absorptions that increase or decrease during the experiment.

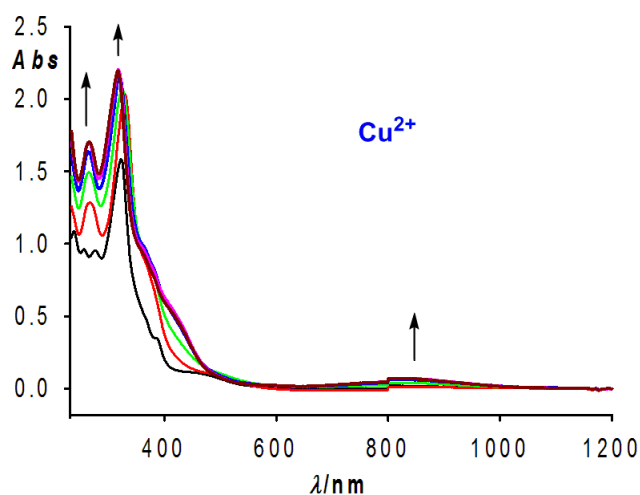

**Figure S14.** Changes in the absorption spectra of **7** ( $c = 5 \cdot 10^{-5}$  M in  $\text{CH}_3\text{CN}$ ) upon addition of increasing amounts of  $\text{Cu}(\text{OTf})_2$ , until 2 equiv were added. Arrows indicate absorptions that increase or decrease during the experiment.

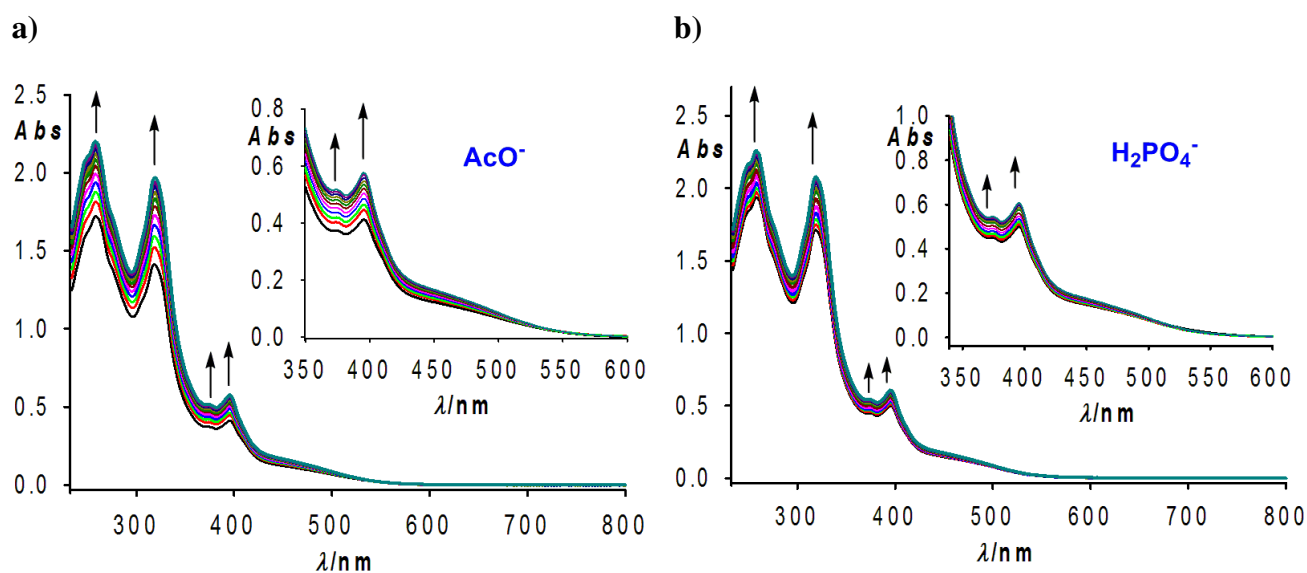

**Figure S15.** Changes in the absorption spectra of **4** ( $c = 5 \cdot 10^{-5}$  M in  $\text{CH}_3\text{CN}$ ) upon addition of increasing amounts of: (a)  $\text{AcO}^-$  until 4 equiv were added, (b)  $\text{H}_2\text{PO}_4^-$ , until 4 equiv were added. Arrows indicate absorptions that increase or decrease during the experiment.

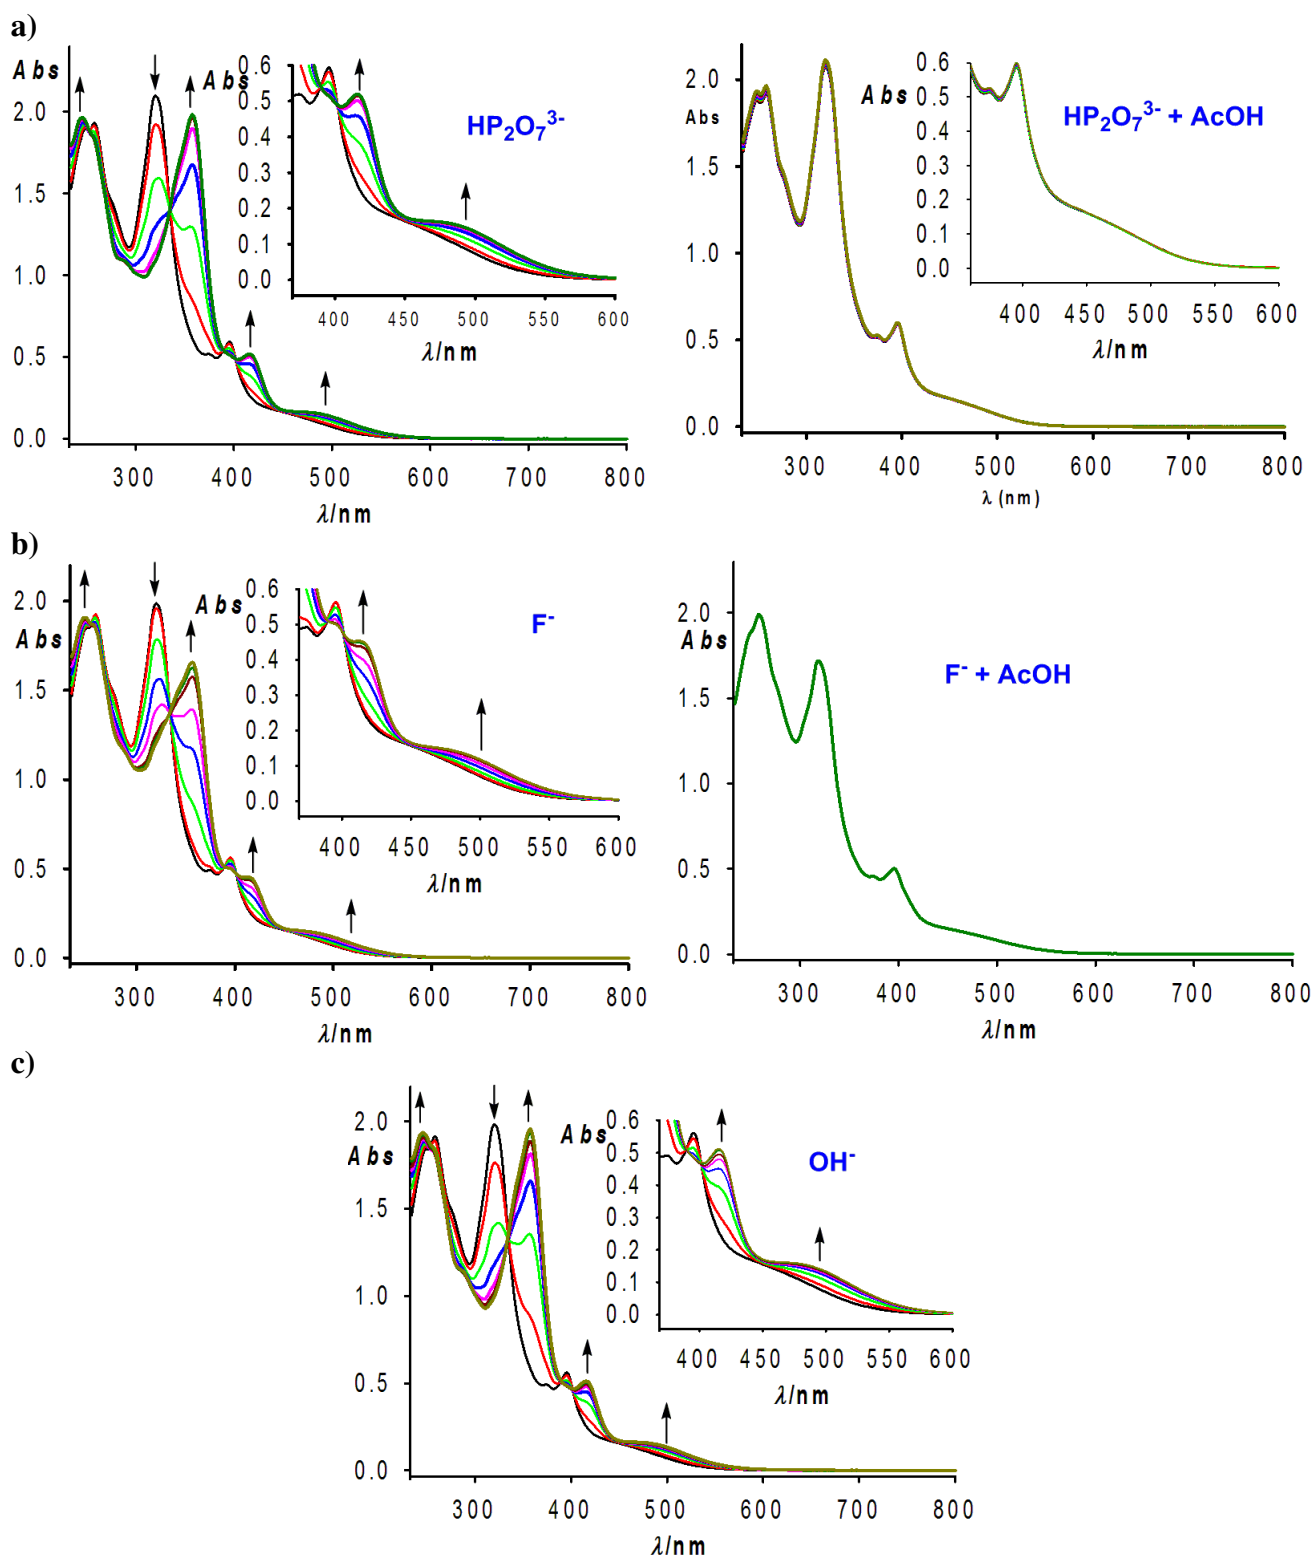

**Figure S16.** Changes in the absorption spectra of **4** ( $c = 5 \times 10^{-5} \text{ M}$  in  $\text{CH}_3\text{CN}$ ) upon addition of increasing amounts of (a)  $\text{HP}_2\text{O}_7^{3-}$  anion, until 3 equiv (left) and in the present of 20 equiv of acetic acid (right); (b)  $\text{F}^-$  anion, until 3 equiv (left) and in the present of 20 equiv of acetic acid (right). (c) Changes in the absorption spectra of **4** ( $c = 5 \times 10^{-5} \text{ M}$  in  $\text{CH}_3\text{CN}$ ) upon addition of increasing amounts of  $\text{OH}^-$  anion. Arrows indicate absorptions that increase or decrease during the experiment.



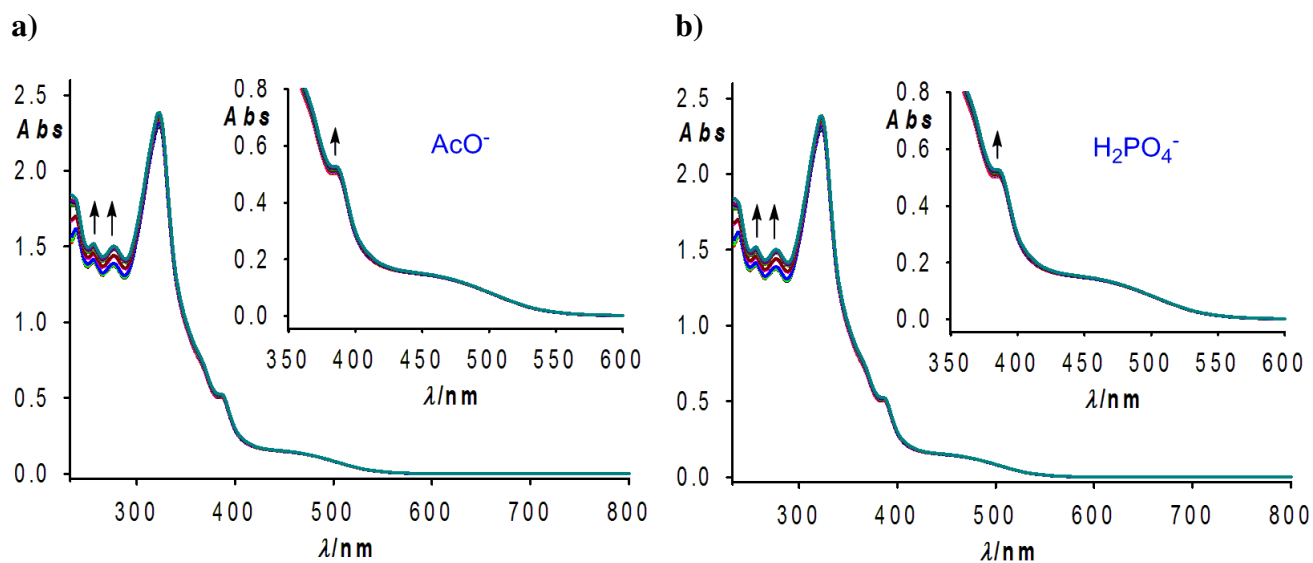

**Figure S17.** Changes in the absorption spectra of **7** ( $c = 5 \cdot 10^{-5}$  M in  $\text{CH}_3\text{CN}$ ) upon addition of increasing amounts of (a)  $\text{AcO}^-$ , until 2 equiv were added; (b)  $\text{H}_2\text{PO}_4^-$ , until 2 equiv were added. Arrows indicate absorptions that increase or decrease during the experiment.

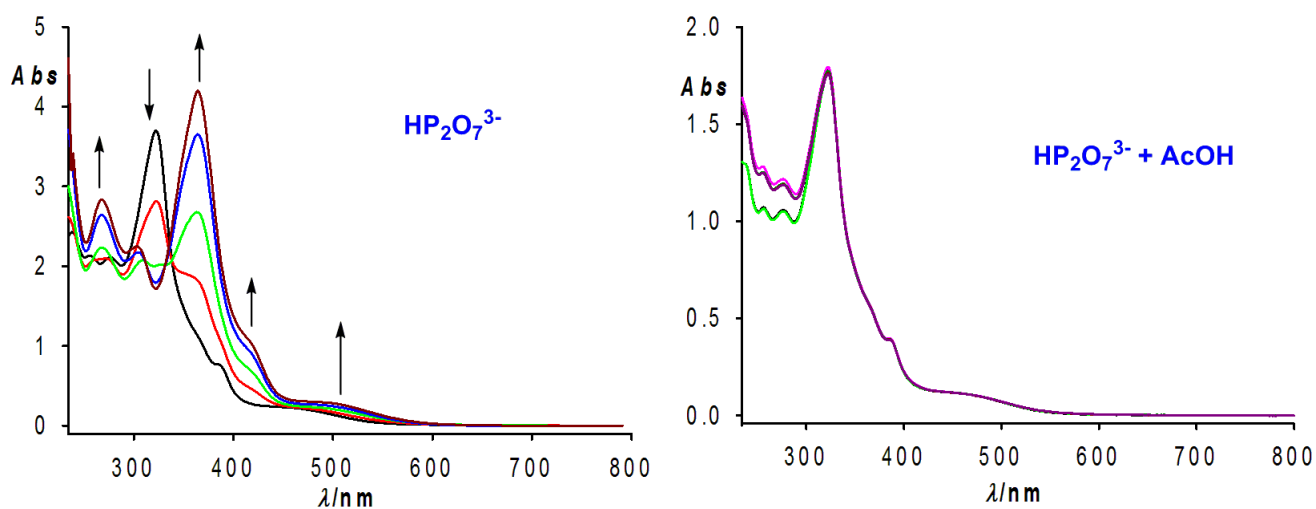

**Figure S18.** Changes in the absorption spectra of **7** ( $c = 5 \times 10^{-5}$  M in  $\text{CH}_3\text{CN}$ ) upon addition of increasing amounts of  $\text{HP}_2\text{O}_7^{3-}$  anion, until 3 equiv (left) and in the presence of 20 equiv of acetic acid (right). Arrows indicate absorptions that increase or decrease during the experiment.

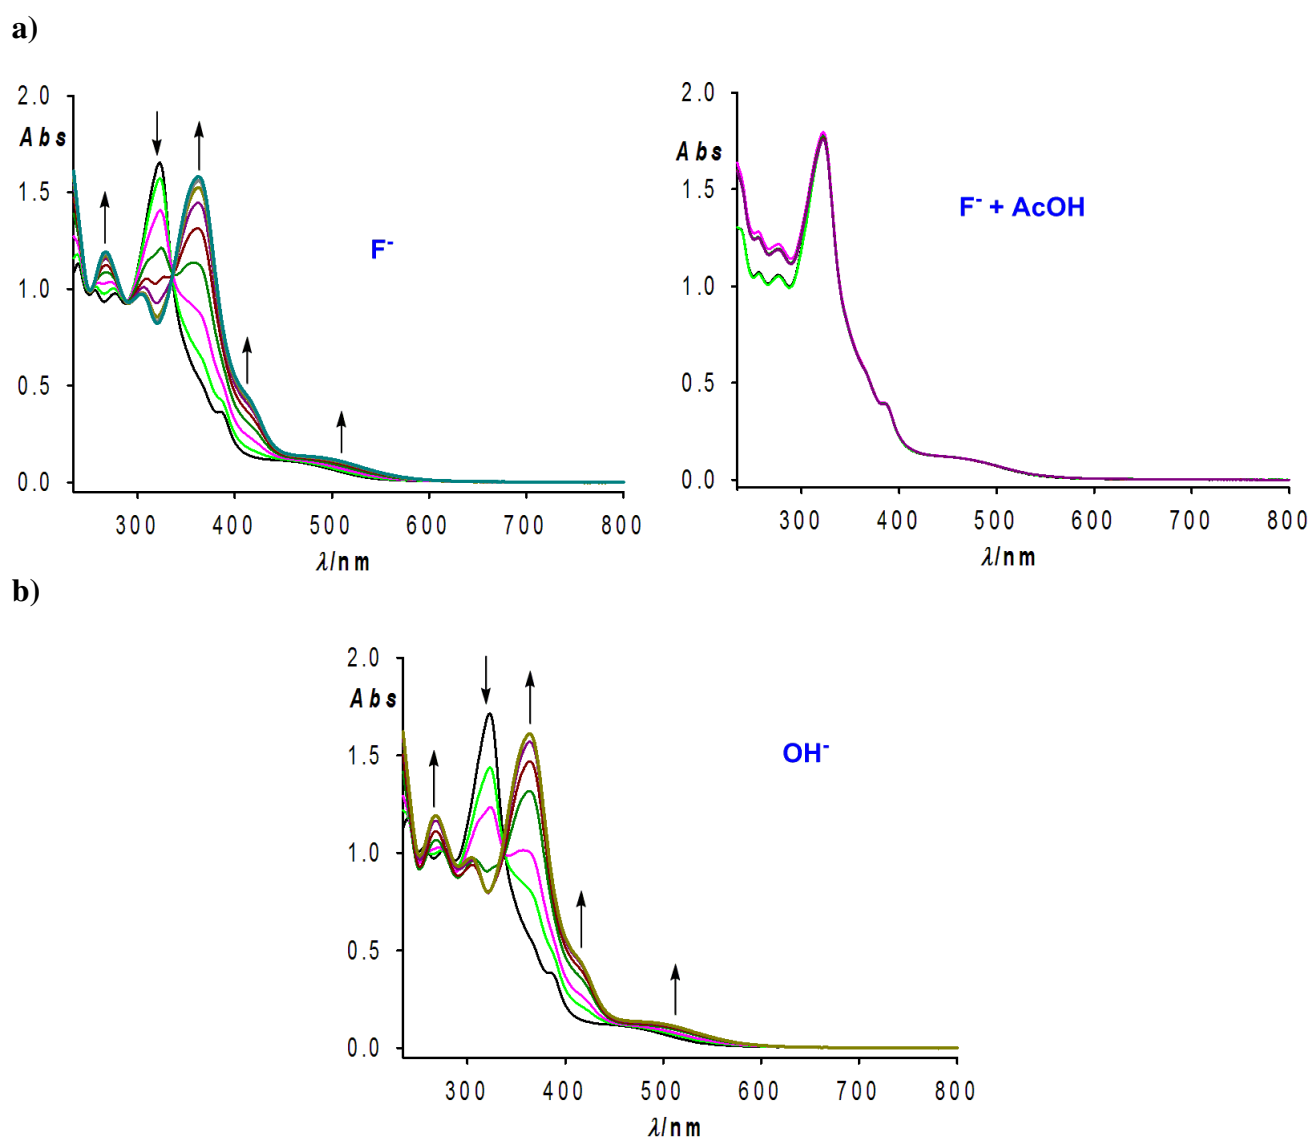

**Figure S19.** Changes in the absorption spectra of **7** ( $c = 5 \times 10^{-5} \text{ M}$  in  $\text{CH}_3\text{CN}$ ) upon addition of increasing amounts of (a)  $\text{F}^-$  anion, until 3 equiv (left) and in the present of 20 equiv of acetic acid (right). (b) Changes in the absorption spectra of **7** ( $c = 5 \times 10^{-5} \text{ M}$  in  $\text{CH}_3\text{CN}$ ) upon addition of increasing amounts of  $\text{OH}^-$  anion. Arrows indicate absorptions that increase or decrease during the experiment.

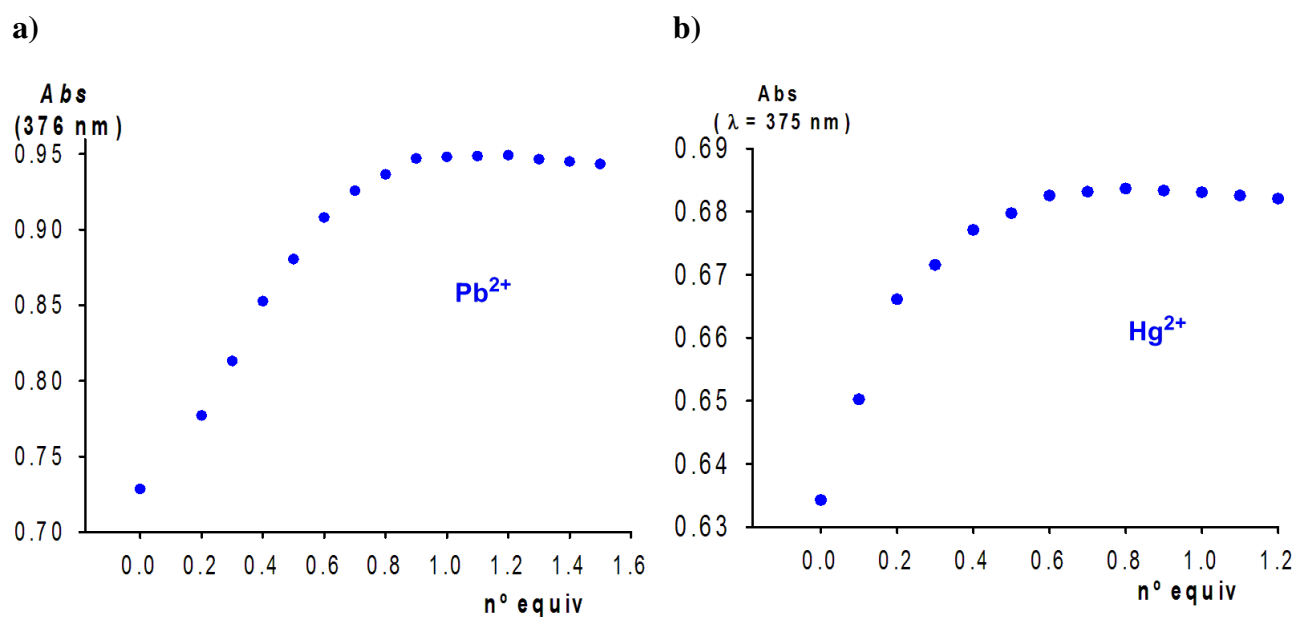

**Figure S20.** Change of absorbance of **4** ( $c = 1 \times 10^{-4} \text{ M}$  in  $\text{CH}_3\text{CN}$ ) at  $\lambda = 375 \text{ nm}$  upon addition of (a)  $\text{Pb}^{2+}$ , indicating the formation of a 1:1 complex; and (b)  $\text{Hg}^{2+}$ , indicating the formation of a 2:1 complex.

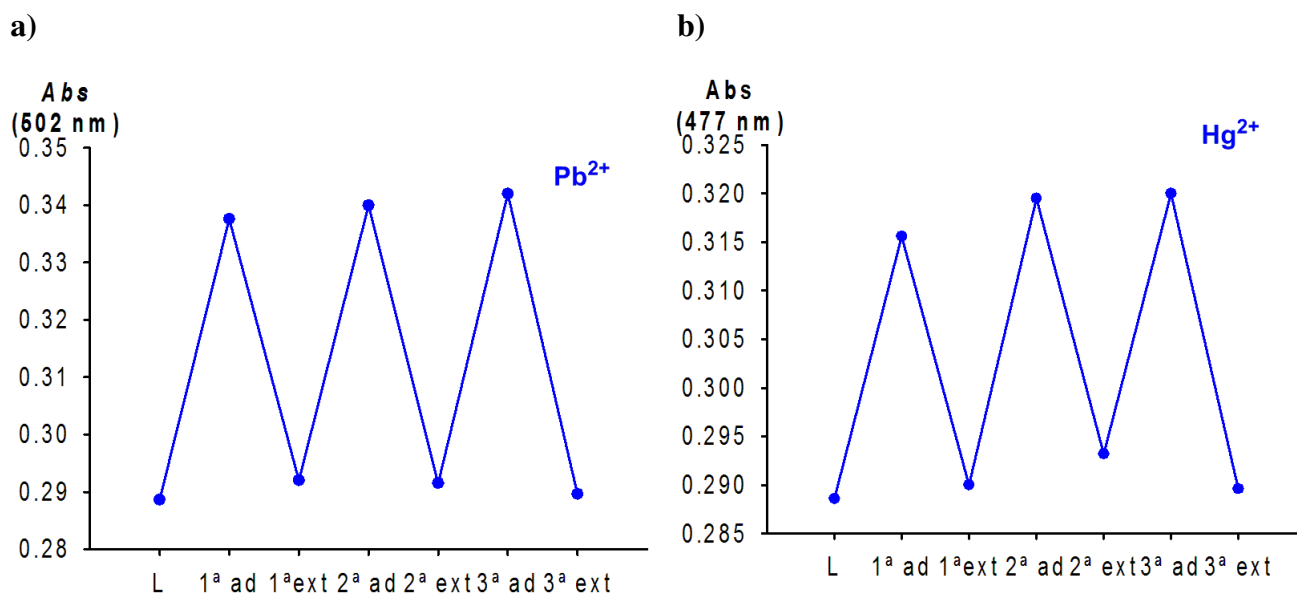

**Figure S21.** Stepwise complexation/decomplexation (extraction with  $\text{H}_2\text{O}$ ) cycles of ligand **4** ( $c = 1 \cdot 10^{-4} \text{ M}$  in  $\text{CH}_2\text{Cl}_2$ ) in the presence of (a)  $\text{Pb}(\text{ClO}_4)_2$  and (b)  $\text{Hg}(\text{OTf})_2$ ; carried out by UV/Vis analysis.

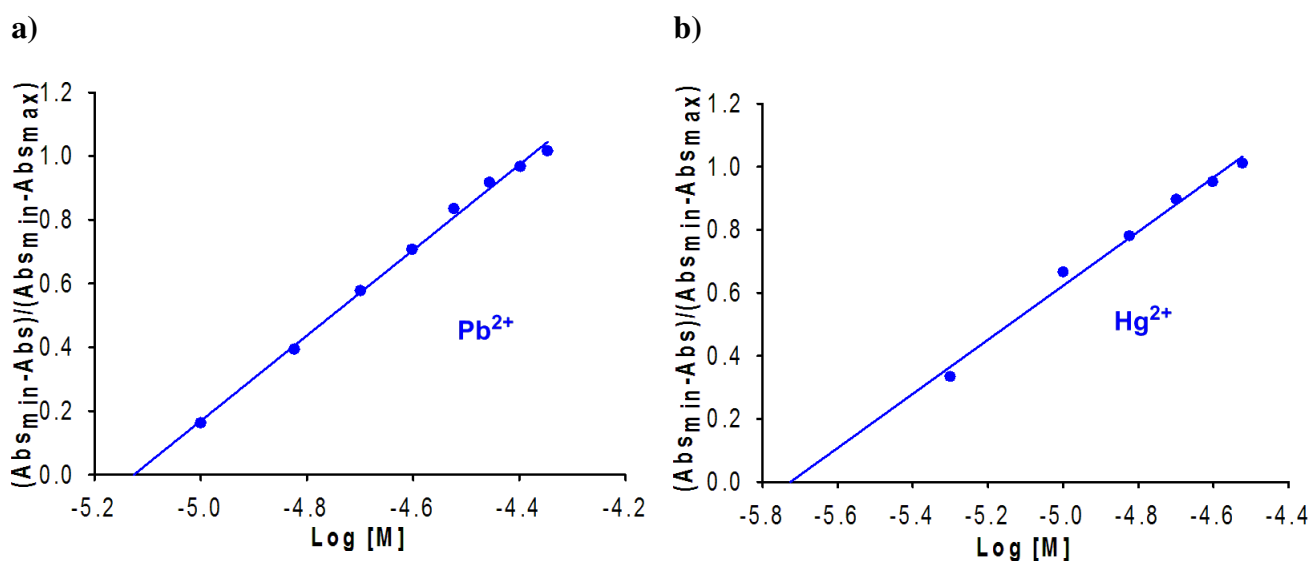

**Figure S22.** Absorbance of **4** ( $c = 5 \times 10^{-5}$  M in  $CH_3CN$ ) at each concentration of cation added (a)  $Pb(ClO_4)_2$ ; (b)  $Hg(OTf)_2$ , normalized between the minimum absorbance, found at zero equiv of metal cation; and the maximum absorbance, found at (a)  $[Pb^{2+}] = 7.47 \cdot 10^{-6}$  M; (b)  $[Hg^{2+}] = 1.22 \cdot 10^{-6}$  M.

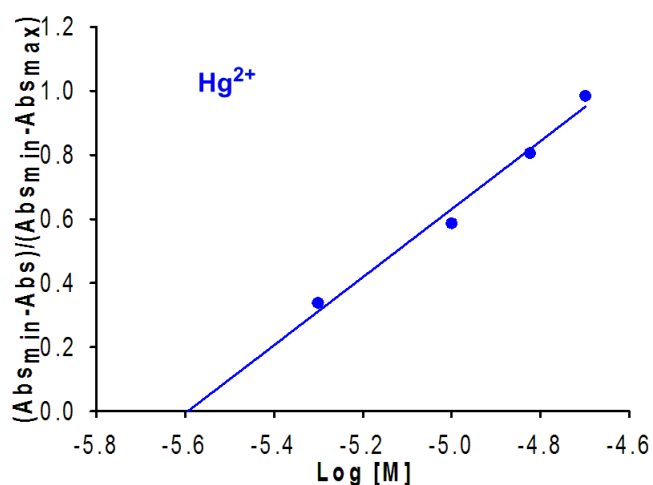

**Figure S23.** Absorbance of **7** ( $c = 5 \times 10^{-5}$  M in  $CH_3CN$ ) at each concentration of cation added  $Hg(OTf)_2$ , normalized between the minimum absorbance, found at zero equiv of metal cation; and the maximum absorbance, found at  $[Hg^{2+}] = 1.55 \cdot 10^{-6}$  M.

**Table S2.** UV-vis data of receptor **4** and **7** in the presence of anions.

| Comp                                                       | UV-vis<br>$\lambda_{\max}$ ( $10^{-3}\epsilon$ ) <sup>a</sup> | IP <sup>b</sup>    |
|------------------------------------------------------------|---------------------------------------------------------------|--------------------|
| <b>4</b>                                                   | 320 (1.707); 375 (0.453); 396 (0.496)                         |                    |
| [ <b>4</b> ·AcO <sup>-</sup> ]                             | 320 (2.216); 375 (0.592); 396 (0.649)                         | --                 |
| [ <b>4</b> ·H <sub>2</sub> PO <sub>4</sub> <sup>-</sup> ]  | 320 (2.083); 375 (0.556); 396 (0.612)                         | --                 |
| [ <b>4</b> ·HP <sub>2</sub> O <sub>7</sub> <sup>3-</sup> ] | 357 (1.988); 415 (0.523); 485 (0.161)                         | 354, 334, 390, 402 |
| [ <b>4</b> ·F <sup>-</sup> ]                               | 357 (1.6630); 415 (0.4597); 485 (0.1551)                      | 354, 334, 390, 402 |
| [ <b>4</b> ·OH <sup>-</sup> ]                              | 357 (1.970); 415 (0.528); 485 (0.165)                         | 354, 334, 390, 402 |
| <b>7</b>                                                   | 323 (2.448), 385 (0.535)                                      |                    |
| [ <b>7</b> ·AcO <sup>-</sup> ]                             | 323 (2.448), 385 (0.546)                                      | --                 |
| [ <b>7</b> ·H <sub>2</sub> PO <sub>4</sub> <sup>-</sup> ]  | 323 (2.448), 385 (0.546)                                      | --                 |
| [ <b>7</b> ·HP <sub>2</sub> O <sub>7</sub> <sup>3-</sup> ] | 304 (0.956), 364 (1.638), 414, (0.458), 500<br>(0.129)        | 254, 284, 338      |
| [ <b>7</b> ·F <sup>-</sup> ]                               | 304 (0.978), 364 (1.585), 414, (0.452), 500<br>(0.126)        | 254, 284, 338      |
| [ <b>7</b> ·OH <sup>-</sup> ]                              | 304 (0.975), 364 (1.609), 414, (0.462), 500<br>(0.121)        | 254, 284, 338      |

<sup>a</sup>  $\lambda_{\max}$  in nm,  $\epsilon$  in dm<sup>3</sup>mol<sup>-1</sup>cm<sup>-1</sup>; <sup>b</sup> isosbestic points in nm

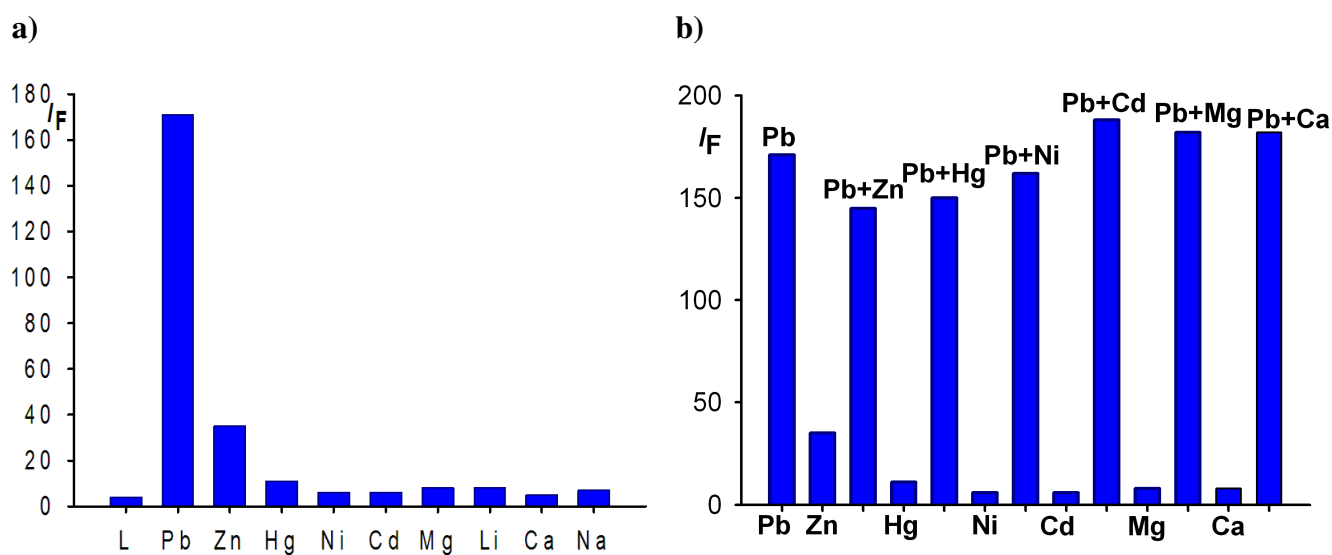

**Figure S24.** (a) Fluorescent intensity of ligand **4** in CH<sub>3</sub>CN, after addition of 1 equiv. of several metal cations. Emission monitored at  $\lambda_{\text{exc}} = 317$  nm. (b) Fluorescence emission intensity of **4** upon addition of 1 equiv. of Pb(ClO<sub>4</sub>)<sub>2</sub> in the presence of 1 equiv. of interference metal ions in CH<sub>3</sub>CN.

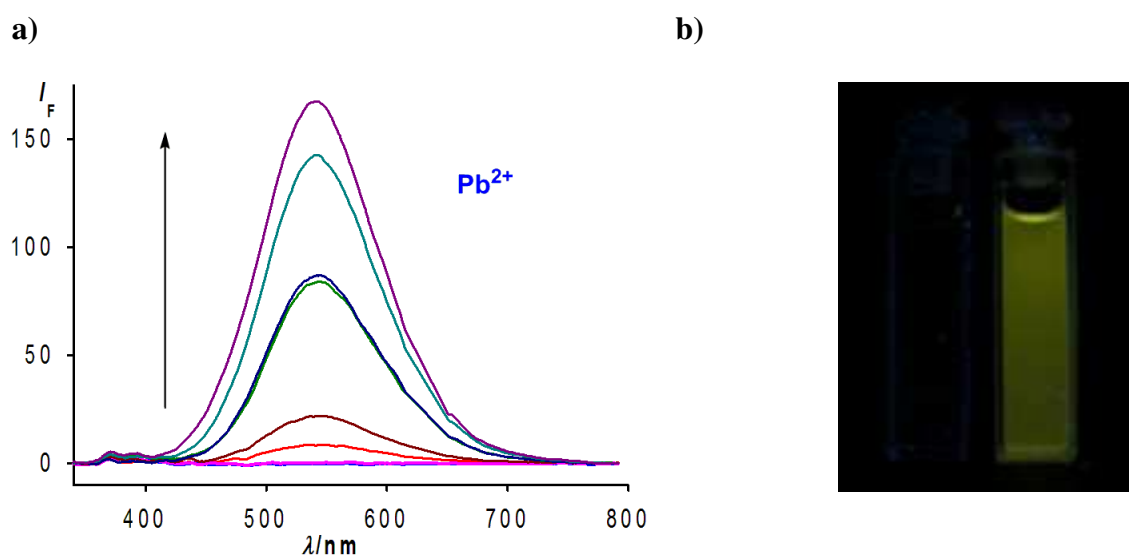

**Figure S25.** (a) Changes in the fluorescence emission spectrum of **4** ( $c = 1 \times 10^{-5}$  M in CH<sub>3</sub>CN) upon titration with Pb(ClO<sub>4</sub>)<sub>2</sub>: the initial (black) is that of **4** and the final one (deep purple), after addition of 1 equiv. of Pb(ClO<sub>4</sub>)<sub>2</sub> ( $c = 2.5 \times 10^{-3}$  M in CH<sub>3</sub>CN). Emission is monitored at  $\lambda_{\text{exc}} = 317$  nm. (b) Visual changes observed in the fluorescence of CH<sub>3</sub>CN solutions of **4** (left) and after addition of Pb(ClO<sub>4</sub>)<sub>2</sub> (right).

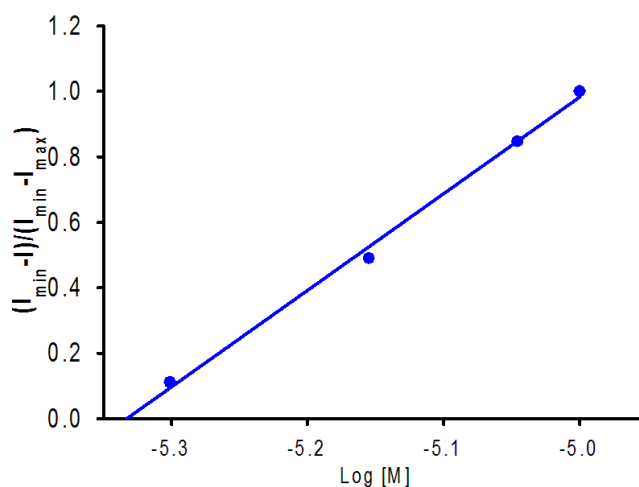

**Figure S26.** Fluorescence intensity of **4** ( $1 \times 10^{-5}$  M in  $\text{CH}_3\text{CN}$ ), at each concentration of  $\text{Pb}(\text{ClO}_4)_2$  ; added, normalized between the minimum fluorescence intensity, found at zero equiv of cation, and the maximum fluorescence intensity, found at  $[\text{Pb}^{2+}] = 4.64 \cdot 10^{-6}$  M.

**Table SI 3.** Fluorescence data of receptor **4** in the presence of  $\text{Pb}(\text{ClO}_4)_2$  in  $\text{CH}_3\text{CN}$  solution.

| Receptor                          | $\lambda_{\text{em}}$ (nm) | $\Phi$ (CHEF)       | Kas ( $\text{M}^{-1}$ ) | L.D. (M)             |
|-----------------------------------|----------------------------|---------------------|-------------------------|----------------------|
| <b>4</b>                          | 520                        | $3.9 \cdot 10^{-4}$ |                         |                      |
| $[\text{4} \cdot \text{Pb}^{2+}]$ | 540                        | 0.019 (50)          | $3.57 \cdot 10^6$       | $4.64 \cdot 10^{-6}$ |

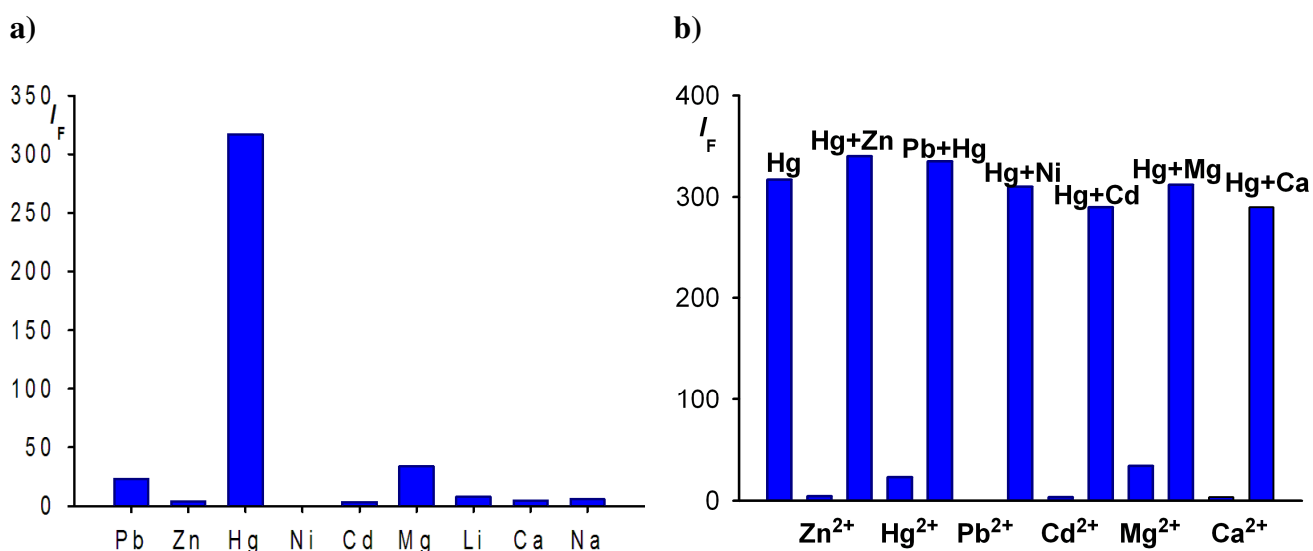

**Figure S27.** (a) Fluorescent intensity of ligand **7** in  $\text{CH}_3\text{CN}$ , after addition of 2 equiv. of several metal cations. Emission monitored at  $\lambda_{\text{exc}} = 340$  nm. (b) Fluorescence emission intensity of **7** upon addition of 2 equiv. of  $\text{Hg}(\text{OTf})_2$  in the presence of 2 equiv. of interference metal ions in  $\text{CH}_3\text{CN}$ .

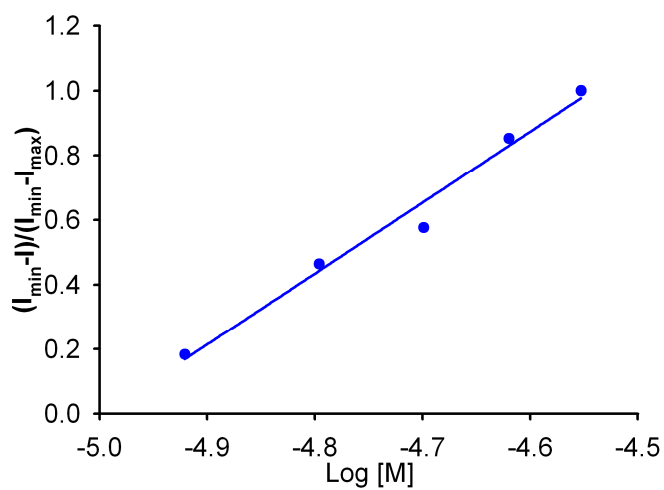

**Figure S28.** Fluorescence intensity of **7** ( $1 \times 10^{-5}$  M in  $\text{CH}_3\text{CN}$ ), at each concentration of  $\text{Hg}(\text{OTf})_2$  ; added, normalized between the minimum fluorescence intensity, found at zero equiv of cation, and the maximum fluorescence intensity, found at  $[\text{Hg}^{2+}] = 1.01 \cdot 10^{-5}$  M.

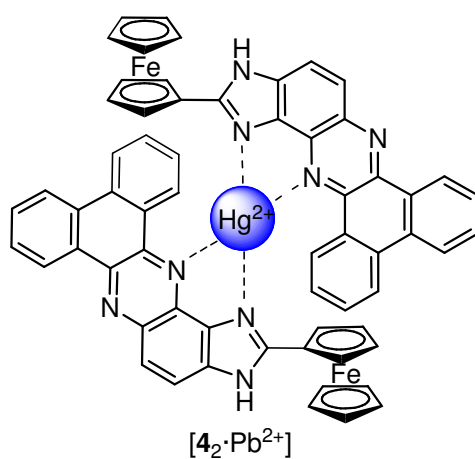

**Chart 1.** Schematic representation of the binding sites where  $\text{Hg}^{2+}$  is bound to the receptors **4**.



**Table S4.**  $^1\text{H}$ -NMR titration data for receptor **4** in the presence of anions and cations.

|   | H <sup>14</sup> | H <sup>7</sup> | H <sup>10</sup> ,<br>H <sup>11</sup> | H <sup>5</sup> | H <sup>4</sup> | H <sup>8</sup> ,<br>H <sup>9</sup> ,<br>H <sup>12</sup> ,<br>H <sup>13</sup> | H <sup>α</sup> | H <sup>α'</sup> | H <sup>β</sup> | H <sup>Cp</sup> |
|---|-----------------|----------------|--------------------------------------|----------------|----------------|------------------------------------------------------------------------------|----------------|-----------------|----------------|-----------------|
| 4 | 9.66            | 9.41           | 8.75                                 | 8.17           | 8.10           | 7.86                                                                         | 5.24           | 5.17            | 4.57           | 4.21            |

|                                               | H <sup>14</sup><br>(Δδ) | H <sup>7</sup><br>(Δδ) | H <sup>10</sup> ,<br>H <sup>11</sup><br>(Δδ) | H <sup>5</sup><br>(Δδ) | H <sup>4</sup><br>(Δδ) | H <sup>8</sup> , H <sup>9</sup> ,<br>H <sup>12</sup> ,<br>H <sup>13</sup><br>(Δδ) | H <sup>α</sup><br>(Δδ) | H <sup>β</sup><br>(Δδ) | H <sup>Cp</sup><br>(Δδ) |
|-----------------------------------------------|-------------------------|------------------------|----------------------------------------------|------------------------|------------------------|-----------------------------------------------------------------------------------|------------------------|------------------------|-------------------------|
| 4+Pb <sup>2+</sup>                            | 9.41<br>(-0.25)         | 9.28<br>(-0.13)        | 8.67<br>(-0.08)                              | 8.27<br>(0.10)         | 8.06<br>(-0.04)        | 7.87<br>(0.01)                                                                    | 5.35                   | 4.92<br>(0.35)         | 4.36<br>(0.15)          |
| 4+H <sub>2</sub> PO <sub>4</sub> <sup>-</sup> | 9.58<br>(-0.08)         | 9.38<br>(-0.03)        | 8.72<br>(-0.03)                              | 8.29<br>(0.12)         | 8.04<br>(-0.06)        | 7.82<br>(-0.04)                                                                   | 5.35                   | 4.53<br>(-0.04)        | 4.2<br>(-0.01)          |
| 4+AcO <sup>-</sup>                            | 9.61<br>(-0.05)         | 9.41<br>(0)            | 8.74<br>(-0.01)                              | 8.20<br>(0.03)         | 8.01<br>(-0.09)        | 7.88<br>(0.02)                                                                    | 5.29                   | 4.53<br>(-0.04)        | 4.18<br>(-0.03)         |

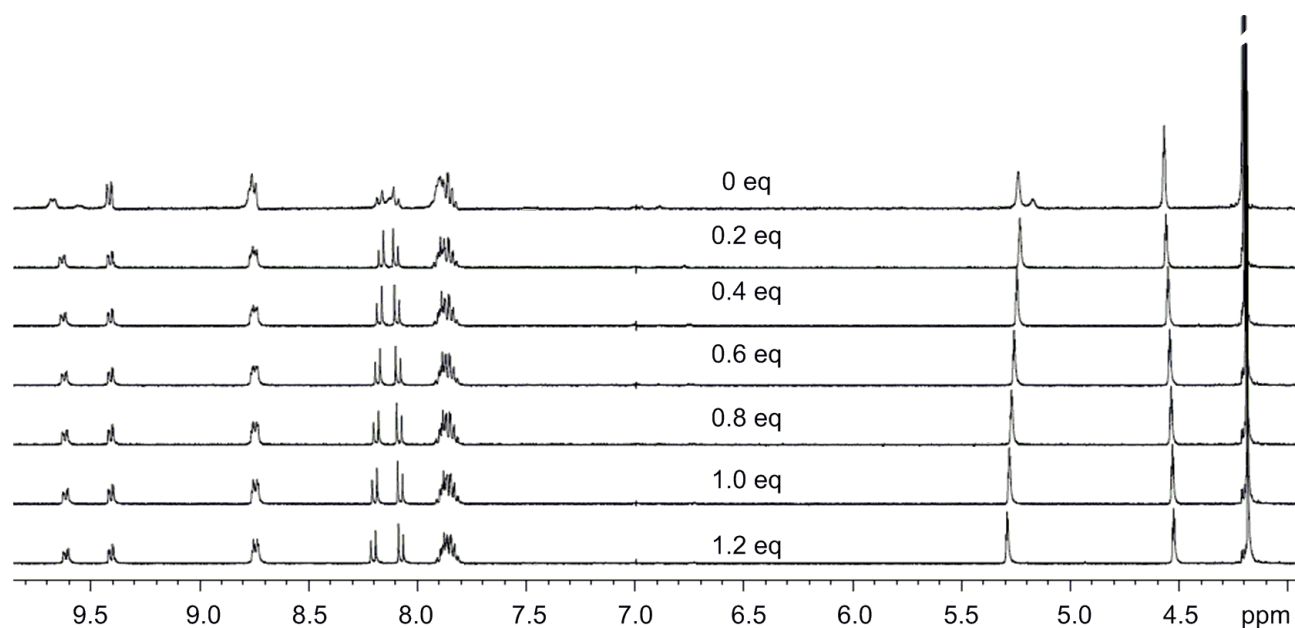

**Figure S29.** Changes in the  $^1\text{H}$ -NMR (in acetonitrile- $\text{d}_3$ ) spectrum of **4** (top) upon addition of increasing amounts of  $\text{AcO}^-$  until 1.2 equiv (bottom).

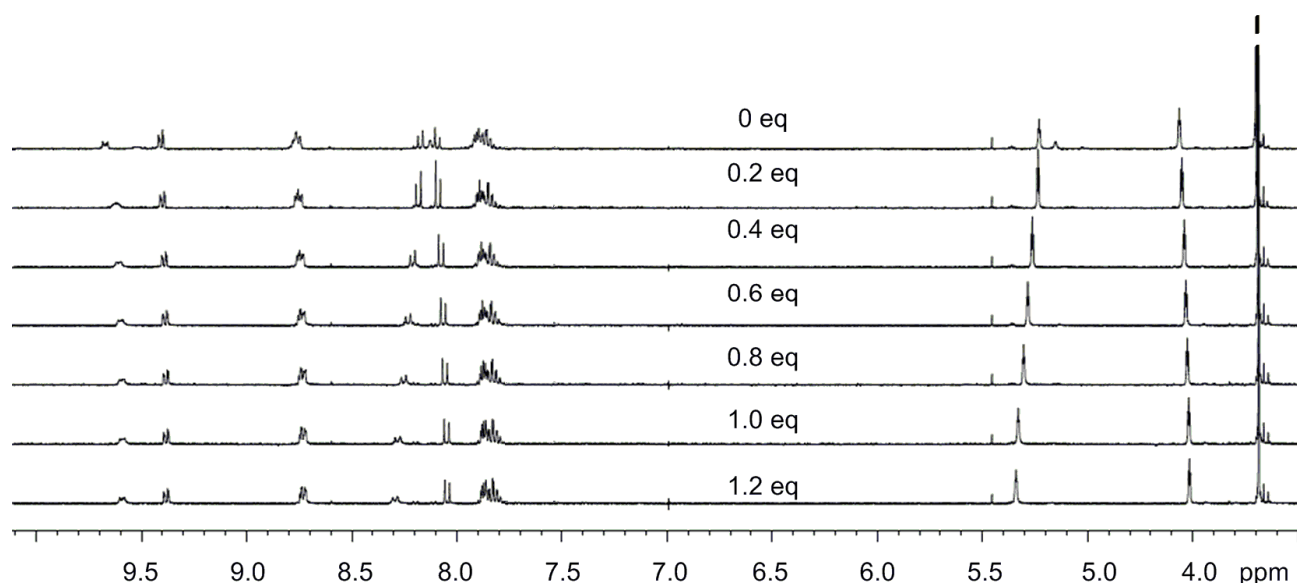

**Figure S30.** Changes in the  $^1\text{H}$ -NMR (in acetonitrile- $\text{d}_3$ ) spectrum of **4** (top) upon addition of increasing amounts of  $\text{H}_2\text{PO}_4^-$  until 1.2 equiv (bottom).

**Table S5.**  $^1\text{H}$ -NMR titration data of receptor **7** in the presence of anions and cations.

|                                      | $\text{H}^9$<br>( $\Delta\delta$ ) | $\text{H}^{12}$<br>( $\Delta\delta$ ) | $\text{H}^7$<br>( $\Delta\delta$ ) | $\text{H}^{14}$<br>( $\Delta\delta$ ) | $\text{H}^4$<br>( $\Delta\delta$ ) | $\text{H}^5$<br>( $\Delta\delta$ ) | $\text{H}^8$<br>( $\Delta\delta$ ) | $\text{H}^{13}$<br>( $\Delta\delta$ ) |
|--------------------------------------|------------------------------------|---------------------------------------|------------------------------------|---------------------------------------|------------------------------------|------------------------------------|------------------------------------|---------------------------------------|
| <b>7</b>                             | 9.79                               | 9.58                                  | 9.24                               | 9.20                                  | 8.24                               | 8.10                               | 8.01                               | 7.94                                  |
| <b>7</b> + $\text{Hg}^{2+}$          | 10.72<br>(0.93)                    | 10.05<br>(0.47)                       | 9.35<br>(0.11)                     | 9.32<br>(0.12)                        | 8.56<br>(0.32)                     | 8.02<br>(0.38)                     | 8.38<br>(0.37)                     | 8.24<br>(0.30)                        |
| <b>7</b> + $\text{AcO}^-$            | 9.72<br>(-0.07)                    | 9.57<br>(-0.01)                       | 9.20<br>(-0.04)                    | 9.18 (-<br>0.02)                      | 8.27 (-<br>0.03)                   | 8.02 (-<br>0.08)                   | 7.93 (-<br>0.08)                   | 7.93 (-<br>0.01)                      |
| <b>7</b> + $\text{H}_2\text{PO}_4^-$ | 9.80<br>(0.01)                     | 9.59<br>(0.01)                        | 9.20<br>(-0.04)                    | 9.17 (-<br>0.03)                      | 8.42<br>(0.18)                     | 7.98 (-<br>0.12)                   | 7.98 (-<br>0.03)                   | 7.92 (-<br>0.02)                      |

|                                      | $\text{H}^\alpha$<br>( $\Delta\delta$ ) | $\text{H}_\beta$<br>( $\Delta\delta$ ) | $\text{H}^{\text{Cp}}$<br>( $\Delta\delta$ ) |
|--------------------------------------|-----------------------------------------|----------------------------------------|----------------------------------------------|
| <b>7</b>                             | 5.29                                    | 4.57                                   | 4.18                                         |
| <b>7</b> + $\text{Hg}^{2+}$          | 5.29<br>(0)                             | 4.49<br>(-0.08)                        | 4.13<br>(-0.05)                              |
| <b>7</b> + $\text{AcO}^-$            | 5.29<br>(0)                             | 4.49<br>(-0.08)                        | 4.13<br>(-0.05)                              |
| <b>7</b> + $\text{H}_2\text{PO}_4^-$ | 5.37<br>(0.08)                          | 4.45<br>(-0.12)                        | 4.13<br>(-0.05)                              |

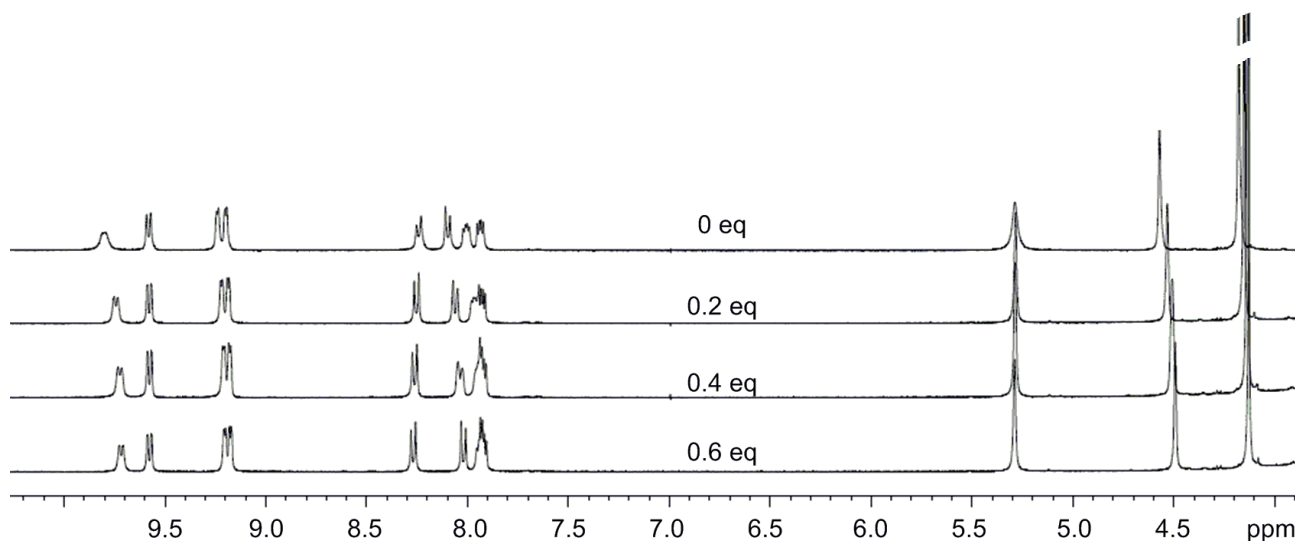

**Figure S31.** Changes in the  $^1\text{H}$ -NMR (in  $\text{DMSO-d}_6$ ) spectrum of **7** (top) upon addition of increasing amounts of  $\text{AcO}^-$  until 0.6 equiv (bottom).

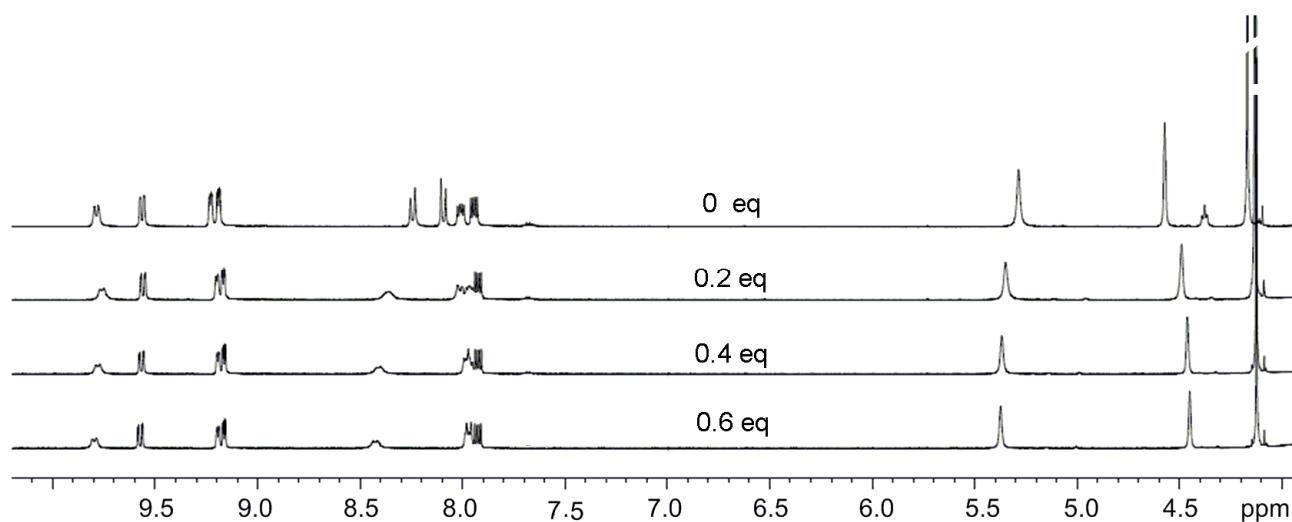

**Figure S32.** Changes in the  $^1\text{H}$ -NMR (in  $\text{DMSO-d}_6$ ) spectrum of **7** (top) upon addition of increasing amounts of  $\text{H}_2\text{PO}_4^-$  until 0.6 equiv (bottom).

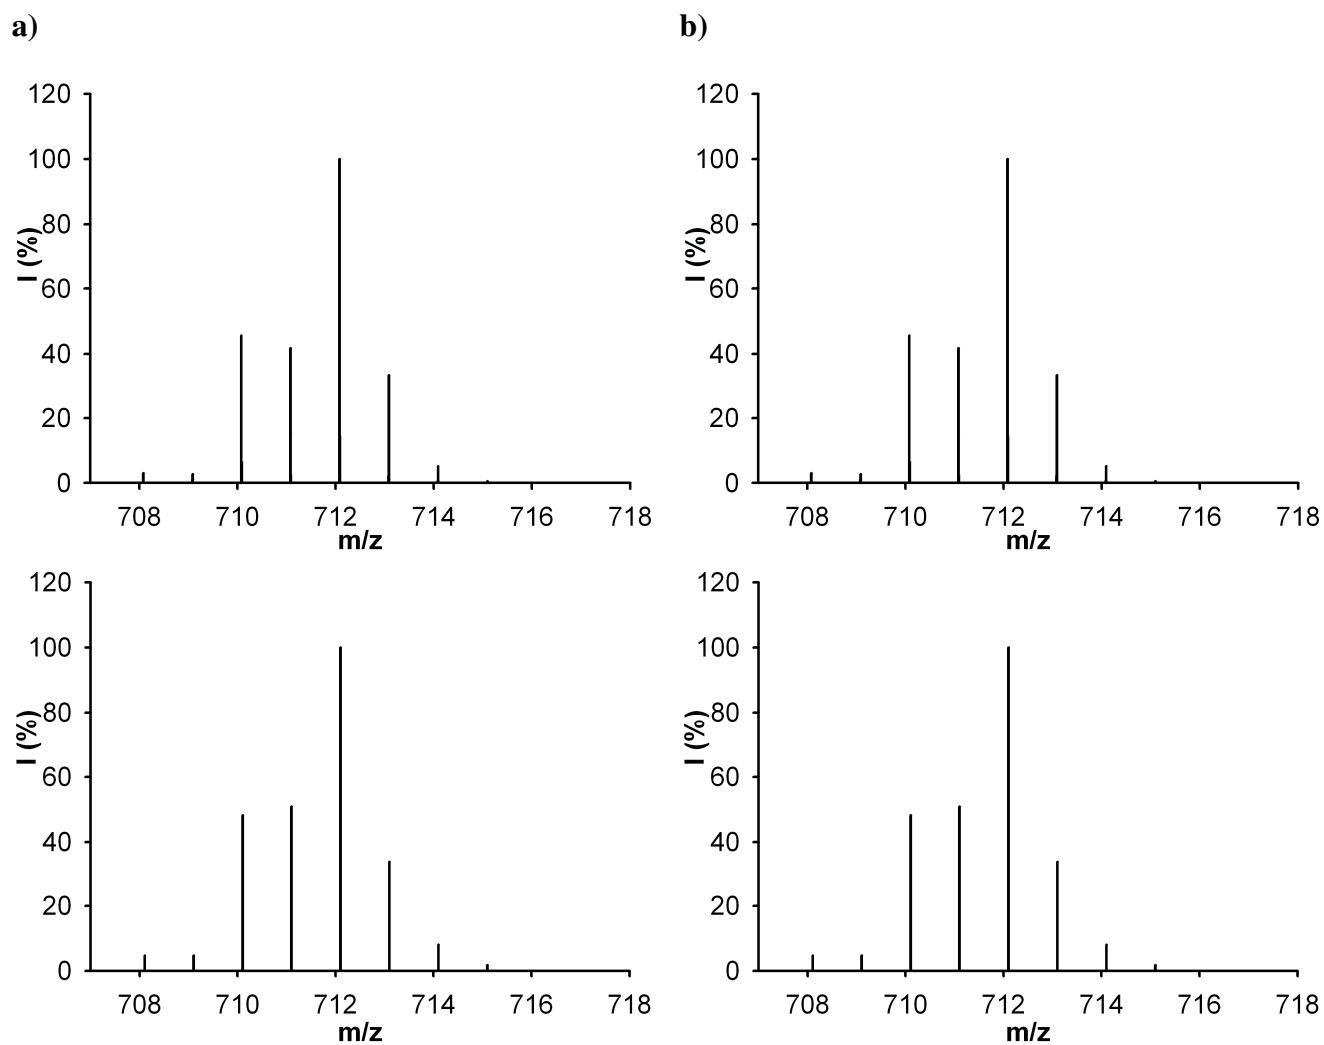

**Figure S33.** Relative abundance of the isotopic cluster for (a)  $4\bullet\text{Pb}^{2+}$ ; (b)  $4_2\bullet\text{Hg}^{2+}$ , (top) simulated; (bottom) experimental.

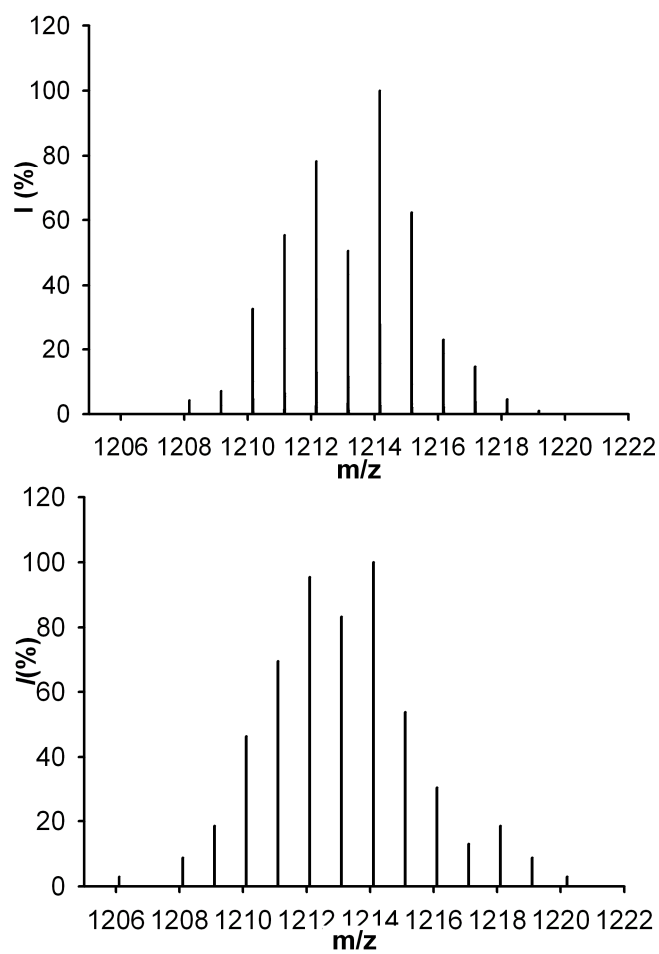

**Figure S34.** Relative abundance of the isotopic cluster for  $4_2\text{Hg}^{2+}$ , (top) simulated; (bottom) experimental.

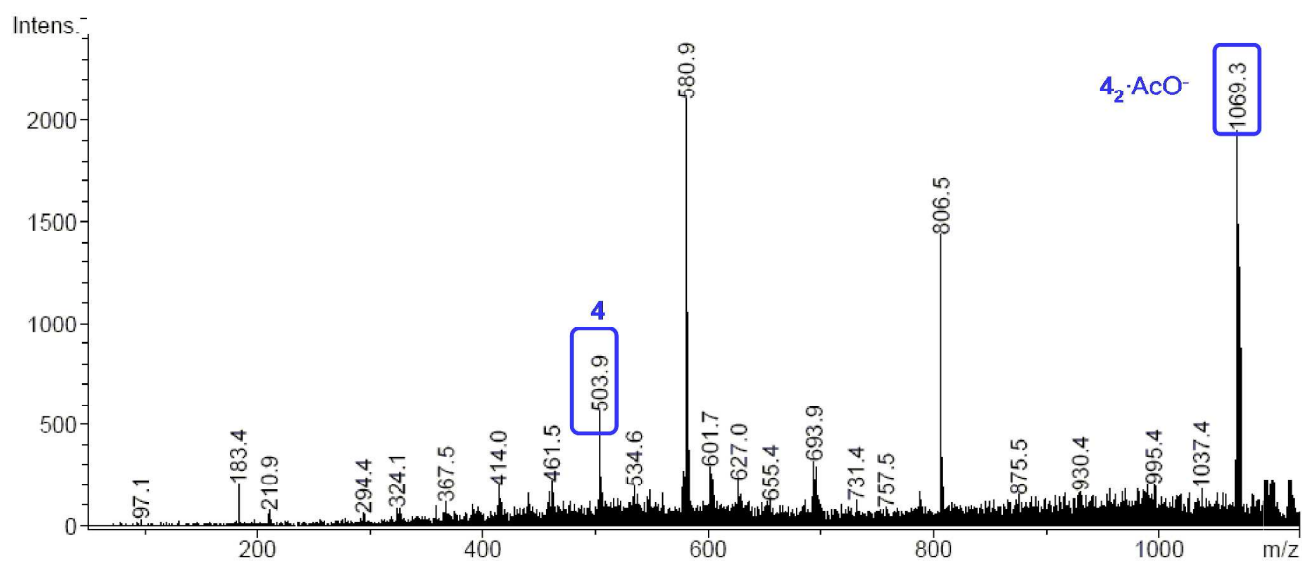

**Figure S35.** ESI-MS spectra of a acetonitrilo solution of an equimolecular amount of  $[(n\text{-Bu})_4\text{N}]\text{AcO}$  and ligand **4**.

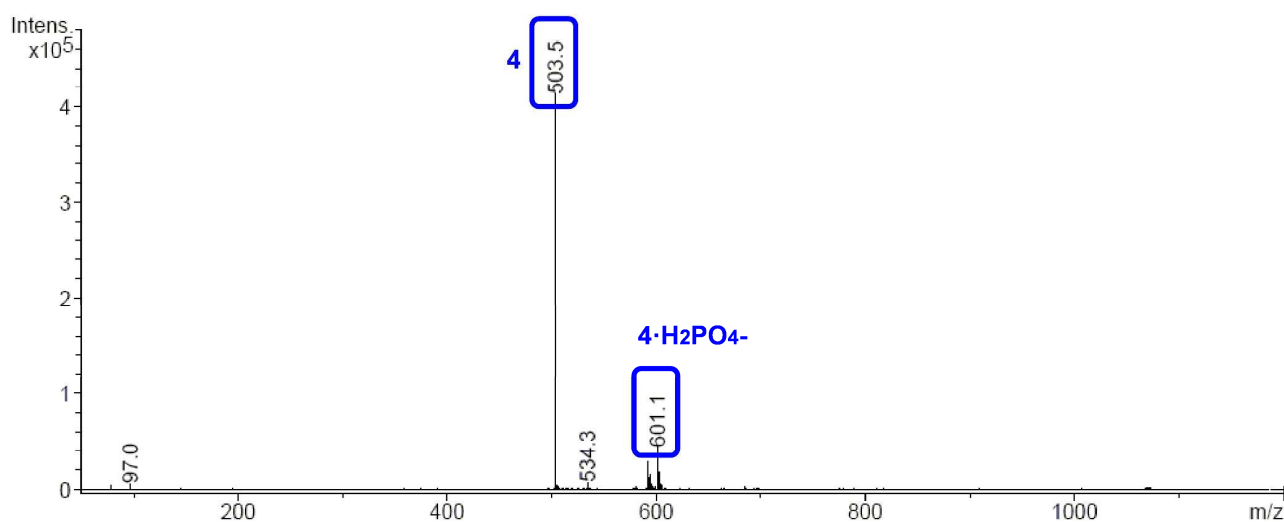

**Figure S36.** ESI-MS spectra of a acetonitrilo solution of an equimolecular amount of  $[(n\text{-Bu})_4\text{N}]\text{H}_2\text{PO}_4$  and ligand **4**.

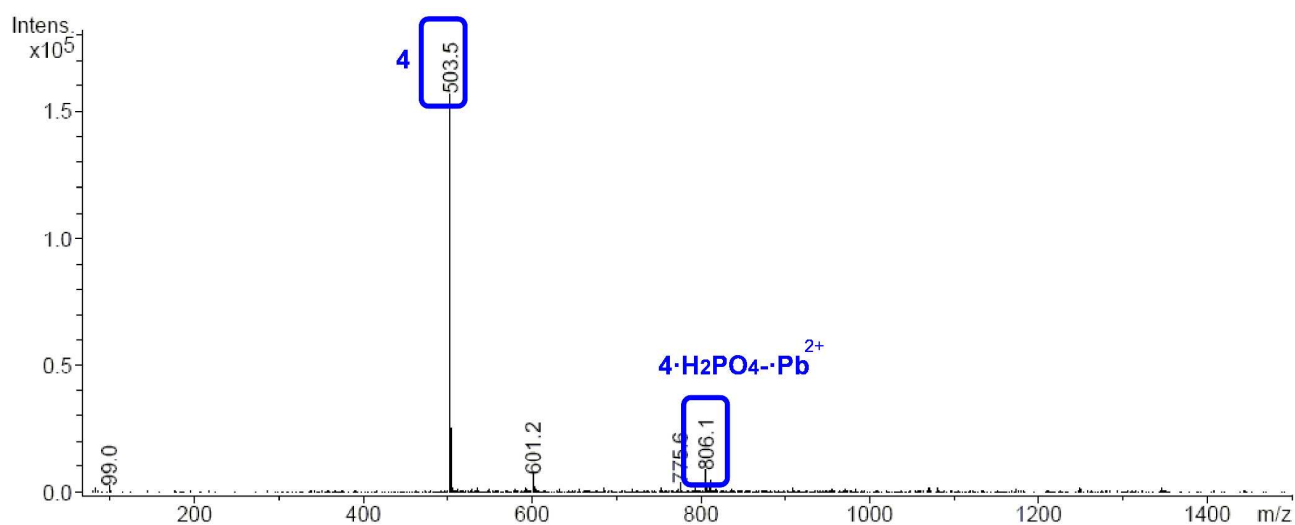

**Figure S37.** ESI-MS spectra of a acetonitrilo solution of an equimolecular amount of [(n-Bu)<sub>4</sub>N]AcO, Pb(ClO<sub>4</sub>)<sub>2</sub> and ligand **4**.

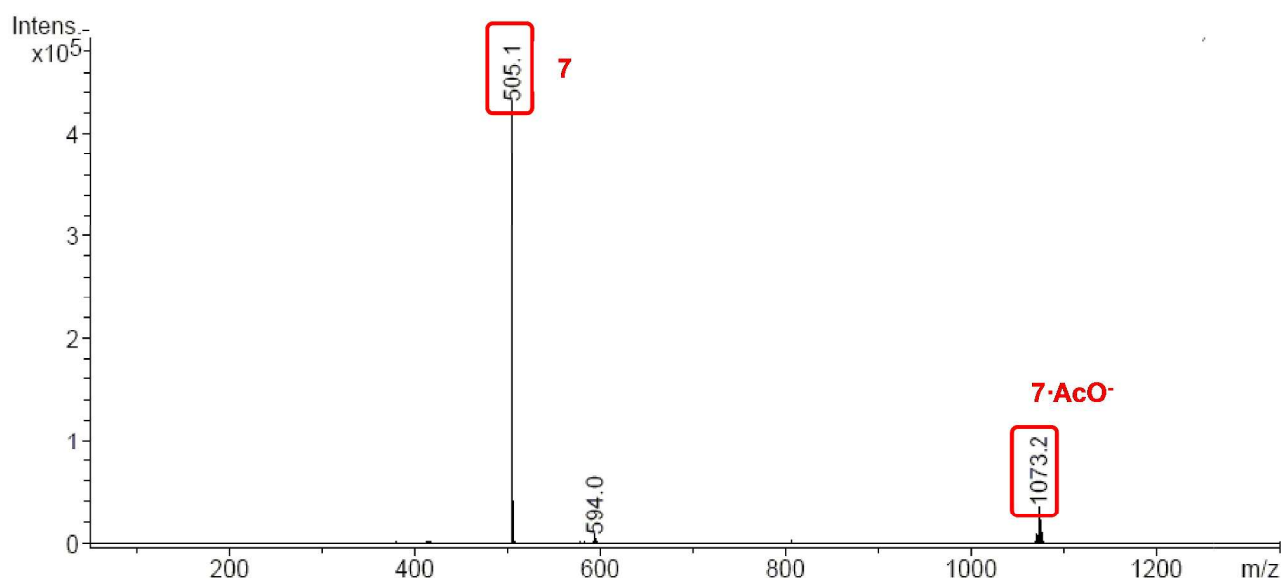

**Figure S38.** ESI-MS spectra of a acetonitrilo solution of an equimolecular amount of [(n-Bu)<sub>4</sub>N]AcO and ligand **4**.

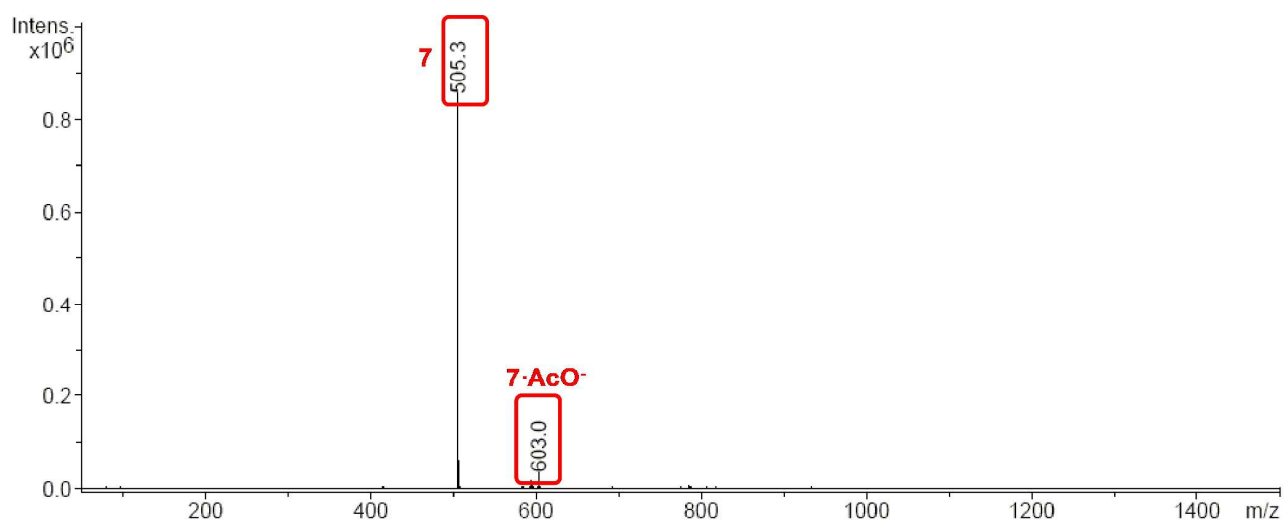

**Figure S39.** ESI-MS spectra of a acetonitrile solution of an equimolecular amount of [(n-Bu)<sub>4</sub>N]H<sub>2</sub>PO<sub>4</sub> and ligand **4**.



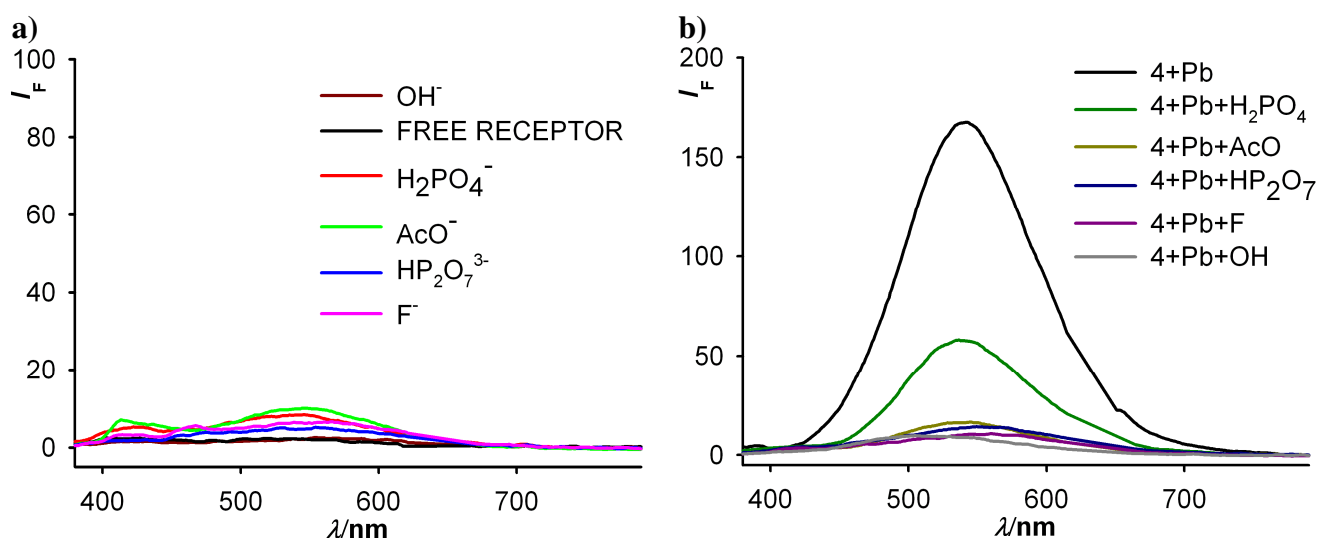

**Figure S40.** (a) Changes in the fluorescence emission spectrum of **4** ( $c=1 \cdot 10^{-5}$  M in  $\text{CH}_3\text{CN}$ ) upon addition of 2 equiv of several anions. Emission monitored at  $\lambda_{\text{exc}} = 317$  nm. (b) Changes in the fluorescence emission spectrum of  $[\mathbf{4} \cdot \text{Pb}^{2+}]$  ( $c=1 \cdot 10^{-5}$  M in  $\text{CH}_3\text{CN}$ ) upon addition of 2 equiv of several anions. Emission monitored at  $\lambda_{\text{exc}} = 317$  nm

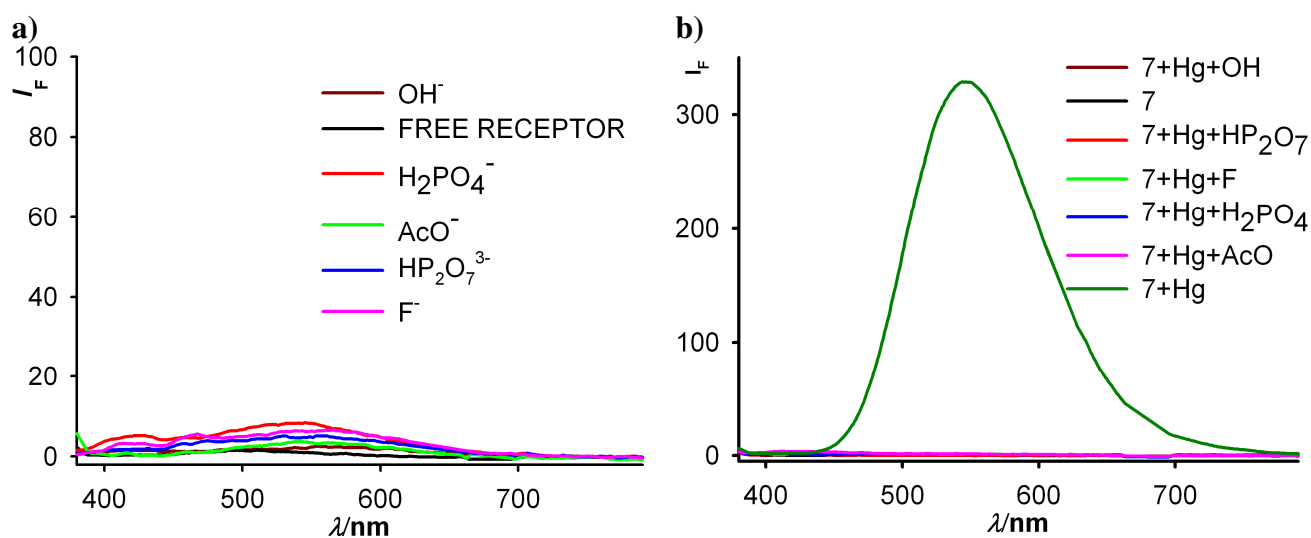

**Figure S41.** (a) Changes in the fluorescence emission spectrum of **7** ( $c=1 \cdot 10^{-5}$  M in  $\text{CH}_3\text{CN}$ ) upon addition of 2 equiv of several anions. Emission monitored at  $\lambda_{\text{exc}} = 340$  nm. (b) Changes in the fluorescence emission spectrum of  $[\mathbf{7} \cdot \text{Hg}^{2+}]$  ( $c=1 \cdot 10^{-5}$  M in  $\text{CH}_3\text{CN}$ ) upon addition of 2 equiv of several anions. Emission monitored at  $\lambda_{\text{exc}} = 340$  nm.

## Experimental Section.-

**General Comments.-** Melting points were determined on a hot-plate melting point apparatus and are uncorrected.  $^1\text{H}$ - and  $^{13}\text{C}$ -NMR spectra were recorded at 400 and 100 MHz, respectively. Chemical shifts refer to signals of tetramethylsilane in the case of  $^1\text{H}$  and  $^{13}\text{C}$  spectra. The following abbreviations are used to represent the multiplicity of the signals: s (singlet), bs (broad singlet), d (doublet), dd (double doublets) m (multiplet) st (pseudotriplet), Cq (quaternary carbon atom).

UV-vis spectra were carried out in a UV-vis-NIR spectrophotometer using a dissolution cell of 10 mm path. The samples were solved in  $\text{CH}_3\text{CN}$  ( $c = 5 \times 10^{-5} \text{ M}$ ) and the spectra were recorded with the spectra background corrected before and after of the sequential additions of aliquots of 0.2 equiv of cations/anions in  $\text{H}_2\text{O}$  ( $c = 2.5 \times 10^{-2} \text{ M}$ ).

Fluorescence spectra were carried out in a fluorescence spectrophotometer using a fluorescence cell 10 mm ( $c \approx 1 \times 10^{-5} \text{ M}$  in  $\text{CH}_3\text{CN}$ ), as it is stated in the corresponding figure captions. Before recording the spectra, the samples were deoxygenated, to remove fluorescence quenching via oxygen, by bubbling nitrogen for at least 10 min. All the spectra were recorded before and after the sequential additions of aliquots of 0.2 equiv of a solution of cations in  $\text{H}_2\text{O}$  ( $c = 2.5 \times 10^{-3} \text{ M}$ ). Quantum yield values were measured with respect to anthracene as standard ( $\Phi = 0.27 \pm 0.01$ )<sup>1</sup>, using the equation  $\Phi_x/\Phi_s = (S_x/S_s) [(1-10^{-A_s})/(1-10^{-A_x})]^2 (n_s^2/n_x^2)$  where x and s indicate the unknown and standard solution, respectively,  $\Phi$  is the quantum yield, S is the area under the emission curve A is the absorbance at the excitation wavelength and n is the index of refraction.

CV and OSWV techniques were performed with a conventional three-electrode configuration consisting of platinum working and auxiliary electrodes and a Ag/AgCl reference electrode. The experiments were carried out with a  $\approx 10^{-4} \text{ M}$  solution of sample in  $\text{CH}_3\text{CN}$  containing 0.1 M ( $n\text{-C}_4\text{H}_9$ )<sub>4</sub>PF<sub>6</sub> (TBAPF<sub>6</sub>) as supporting electrolyte. All the potential values reported are relative to the decamethylferrocene (DMFc) couple at room temperature. Deoxygenation of the solutions was achieved by bubbling nitrogen for at least 10 min and the working electrode was cleaned after each run. The cyclic voltammograms were recorded with a scan rate increasing from 0.05 to 1.00  $\text{Vs}^{-1}$ , while the OSWV were recorded at a scan rate of 100  $\text{mVs}^{-1}$  with a pulse height of 10 mV and a step time of 50 ms. Typically, receptor ( $1 \times 10^{-4} \text{ M}$ ) was dissolved in  $\text{CH}_3\text{CN}$  (5 mL) and TBAPF<sub>6</sub> (base electrolyte) (0.190 g) added. The guest under investigation was then added as a  $2.5 \times 10^{-2} \text{ M}$  solution in  $\text{CH}_3\text{CN}$  using a microsyringe whilst the cyclic voltammetric properties of the solution were monitored. DMFc was used as an external reference both for potential calibration and for reversibility criteria.

## References.-

- 1.- Dawson, W.R.; Windsor, M.W. *J. Phys.Chem.* **1968**, 72, 3251-3260
